# Supplementary material for: Predicted impact of the viral mutational landscape on the cytotoxic response against SARS-CoV-2
Source: PLoS Comput Biol. 2022 Feb 10;18(2):e1009726. doi: 10.1371/journal.pcbi.1009726 (PMC8830725; doi:10.1371/journal.pcbi.1009726)
Supplement: S5 Table — (XLSX) [file pcbi.1009726.s007.xlsx]

## Sheet: Hoja1
S5 Table. Isolates carrying escape mutations for five or more supermotifs
Assembly accession	Number of mutations	Number of escape supermotifs	Number of affected supertypes	Country	M49 area	Collection date
MW673525	40	19	5	USA	Northern America	2021-02-08
MT577016	297	18	7	India	Southern Asia	2020
MW694016	31	15	9	USA	Northern America	2021-02-11
MW156473	51	14	7	Australia	Australia and New Zealand	2020-07-28
MT451283	276	14	8	Australia	Australia and New Zealand	2020-03-24
MW653643	21	13	6	USA	Northern America	2020-12-07
MW525102	27	13	4	USA	Northern America	2021-01-10
MW689154	62	13	7	USA	Northern America	2021-02-13
MT451436	134	13	8	Australia	Australia and New Zealand	2020-03-26
MT451279	142	13	8	Australia	Australia and New Zealand	2020-03-24
MW586153	16	12	4	USA	Northern America	2021-01-28
MW693032	18	12	5	USA	Northern America	2020-11-05
MW741583	26	12	6	USA	Northern America	2021-02-23
MW725850	27	12	8	USA	Northern America	2021-02-24
MW751588	30	12	6	USA	Northern America	2021-03-04
MW596067	32	12	4	USA	Northern America	2021-01-29
MW673042	33	12	3	USA	Northern America	2021-02-07
MW518131	34	12	5	USA	Northern America	2021-01-03
MW673420	38	12	6	USA	Northern America	2021-02-09
MW190139	49	12	8	USA	Northern America	2020-07-16
MW704295	50	12	7	Bahrain	Western Asia	2021-01-19
MW474268	54	12	7	USA	Northern America	2020-11-12
MW406716	58	12	9	USA	Northern America	2020-06-24
MW406699	62	12	8	USA	Northern America	2020-06-24
MW617514	62	12	7	USA	Northern America	2021-02-02
MW449384	63	12	7	USA	Northern America	2020-11-30
MW228176	68	12	8	USA	Northern America	2020-06-16
MW783199	68	12	6	USA	Northern America	2021-03-02
MW715548	71	12	7	USA	Northern America	2021-02-19
MW542158	75	12	8	USA	Northern America	2021-01-13
MW702787	14	11	7	USA	Northern America	2021-01-13
MW702788	14	11	7	USA	Northern America	2021-01-13
MW702806	14	11	7	USA	Northern America	2021-01-12
MW578210	14	11	5	USA	Northern America	2021-01-26
MW736722	15	11	7	USA	Northern America	2021-01-08
MW578205	15	11	5	USA	Northern America	2021-01-25
MW704922	15	11	5	USA	Northern America	2021-02-10
MW707543	15	11	5	USA	Northern America	2021-02-16
MW707661	15	11	5	USA	Northern America	2021-02-17
MW766550	15	11	5	USA	Northern America	2021-02-16
MW741593	17	11	6	USA	Northern America	2021-02-23
MW687475	19	11	5	USA	Northern America	2021-02-02
MW778851	19	11	5	USA	Northern America	2021-02-21
MW736721	20	11	7	USA	Northern America	2021-01-08
MW750117	20	11	6	USA	Northern America	2021-02-22
MW701999	20	11	4	USA	Northern America	2020-12-02
MW672938	23	11	7	USA	Northern America	2021-02-07
MW673103	23	11	4	USA	Northern America	2021-02-07
MW725662	24	11	6	USA	Northern America	2021-02-12
MW704460	25	11	8	USA	Northern America	2021-02-19
MW704424	26	11	7	USA	Northern America	2021-02-22
MT678839	28	11	6	South Korea	Eastern Asia	2020-03-11
MW777769	29	11	4	USA	Northern America	2021-02-16
MW490972	30	11	6	USA	Northern America	2020-10-19
MW672974	30	11	4	USA	Northern America	2021-02-07
MW774047	33	11	5	USA	Northern America	2021-02-23
MW687247	35	11	7	USA	Northern America	2021-02-10
MW190103	36	11	7	USA	Northern America	2020-06-07
MT834702	39	11	7	USA	Northern America	2020-04-03
MT834707	40	11	7	USA	Northern America	2020-04-03
MW593841	43	11	8	USA	Northern America	2020-03-12
MW571209	46	11	7	USA	Northern America	2020-11-20
MW571207	52	11	7	USA	Northern America	2020-11-19
MW571211	53	11	7	USA	Northern America	2020-12-03
MW704291	56	11	8	Bahrain	Western Asia	2021-02-13
MW591247	56	11	7	USA	Northern America	2021-01-21
MW715525	60	11	7	USA	Northern America	2021-02-16
MW715509	63	11	8	USA	Northern America	2021-02-15
MW673477	64	11	6	USA	Northern America	2021-02-08
MW134518	68	11	7	USA	Northern America	2020-07-19
MW590844	80	11	6	USA	Northern America	2020-11-18
MT451263	107	11	7	Australia	Australia and New Zealand	2020-03-22
MT451269	115	11	7	Australia	Australia and New Zealand	2020-03-23
MT451276	118	11	8	Australia	Australia and New Zealand	2020-03-23
MW735084	11	10	5	USA	Northern America	2021-02-22
MW780628	15	10	5	USA	Northern America	2021-03-01
MW781545	15	10	5	USA	Northern America	2021-03-01
MW643995	15	10	4	USA	Northern America	2021-01-31
MW780557	15	10	4	USA	Northern America	2021-02-25
MW667053	16	10	5	USA	Northern America	2021-01-25
MW735329	16	10	4	USA	Northern America	2021-02-27
MW549265	18	10	5	USA	Northern America	2020-12-28
MW723425	20	10	6	USA	Northern America	2021-03-02
MW555911	20	10	5	USA	Northern America	2021-01-09
MW685761	20	10	4	USA	Northern America	2021-02-08
MW693774	20	10	4	USA	Northern America	2021-02-11
MW693948	20	10	4	USA	Northern America	2021-02-11
MW723421	21	10	6	USA	Northern America	2021-02-27
MW782755	21	10	3	USA	Northern America	2021-03-02
MW687592	22	10	6	USA	Northern America	2021-02-10
MW723424	22	10	6	USA	Northern America	2021-02-25
MW729270	22	10	6	USA	Northern America	2021-03-08
MW748245	22	10	6	USA	Northern America	2021-02-09
MW750086	22	10	6	USA	Northern America	2021-02-08
MW772190	22	10	4	USA	Northern America	2021-02-25
MW645616	23	10	6	USA	Northern America	2020-11-20
MW723428	23	10	6	USA	Northern America	2021-03-02
MW724495	23	10	6	USA	Northern America	2021-03-03
MW729267	23	10	6	USA	Northern America	2021-03-05
MW751581	23	10	6	USA	Northern America	2021-03-04
MW751584	23	10	6	USA	Northern America	2021-03-04
MW751585	23	10	6	USA	Northern America	2021-03-04
MW751587	23	10	6	USA	Northern America	2021-03-04
MW751623	23	10	6	USA	Northern America	2021-03-05
MW781854	23	10	6	USA	Northern America	2021-03-10
MW781855	23	10	6	USA	Northern America	2021-03-10
MW699916	24	10	6	USA	Northern America	2021-02-24
MW709038	24	10	6	USA	Northern America	2021-01-28
MW725833	24	10	6	USA	Northern America	2021-02-22
MW725851	24	10	6	USA	Northern America	2021-02-24
MW751561	24	10	6	USA	Northern America	2021-02-23
MW751576	24	10	6	USA	Northern America	2021-03-02
MW751577	24	10	6	USA	Northern America	2021-03-04
MW751578	24	10	6	USA	Northern America	2021-03-04
MW751582	24	10	6	USA	Northern America	2021-03-04
MW751583	24	10	6	USA	Northern America	2021-03-04
MW751615	24	10	6	USA	Northern America	2021-03-04
MW751626	24	10	6	USA	Northern America	2021-03-02
MW723415	25	10	6	USA	Northern America	2021-02-11
MW725814	25	10	6	USA	Northern America	2021-02-23
MW751600	25	10	6	USA	Northern America	2021-03-04
MW751602	25	10	6	USA	Northern America	2021-03-02
MW751603	25	10	6	USA	Northern America	2021-03-04
MW781846	25	10	6	USA	Northern America	2021-02-25
MW781850	25	10	6	USA	Northern America	2021-03-10
MW681533	26	10	6	USA	Northern America	2021-02-11
MW781847	26	10	6	USA	Northern America	2021-03-03
MW781851	26	10	6	USA	Northern America	2021-03-10
MW780408	26	10	5	USA	Northern America	2021-02-22
MW518164	26	10	4	USA	Northern America	2021-01-02
MW713658	27	10	6	USA	Northern America	2021-02-24
MW023407	28	10	6	USA	Northern America	2020-04-13
MW739356	28	10	6	USA	Northern America	2021-01-04
MW672995	29	10	5	USA	Northern America	2021-02-08
MW694044	30	10	7	USA	Northern America	2021-02-11
MT509682	34	10	6	USA	Northern America	2020-03-24
MW586396	35	10	6	USA	Northern America	2021-01-22
MW493995	36	10	7	USA	Northern America	2020-11-27
MW693544	39	10	5	USA	Northern America	2021-02-09
MW593820	46	10	7	USA	Northern America	2020-04-09
MW698164	46	10	7	USA	Northern America	2021-02-15
MW571206	47	10	7	USA	Northern America	2020-11-19
MW134538	47	10	6	USA	Northern America	2020-03-25
MW704337	52	10	7	Bahrain	Western Asia	2021-02-06
MW739921	53	10	6	USA	Northern America	2020-11-19
MW474275	54	10	6	USA	Northern America	2020-11-13
MW565455	56	10	4	USA	Northern America	2020-08-24
MW223105	58	10	5	USA	Northern America	2020-06-16
MW698808	59	10	4	USA	Northern America	2021-02-23
MW040674	60	10	7	USA	Northern America	2020-05-07
MW483347	62	10	6	USA	Northern America	2020-10-21
MW424998	62	10	5	USA	Northern America	2020-07-08
MW555914	64	10	5	USA	Northern America	2021-01-11
MW698809	67	10	5	USA	Northern America	2021-02-24
MW782900	67	10	5	USA	Northern America	2021-03-03
MW698800	68	10	5	USA	Northern America	2021-02-20
MW693441	69	10	8	USA	Northern America	2021-02-11
MW555937	69	10	7	USA	Northern America	2021-01-11
MW617698	70	10	5	USA	Northern America	2021-01-29
MW673460	71	10	8	USA	Northern America	2021-02-09
MW474334	71	10	6	USA	Northern America	2020-11-19
MW549252	80	10	7	USA	Northern America	2020-12-22
MW735416	81	10	6	Philippines	Southeastern Asia	2021-01-07
MW741576	12	9	3	USA	Northern America	2021-02-16
MW642485	13	9	3	USA	Northern America	2021-01-23
MW730980	14	9	3	USA	Northern America	2021-01-06
MW583157	15	9	4	USA	Northern America	2021-01-17
MW707686	15	9	4	USA	Northern America	2021-02-17
MW766523	15	9	4	USA	Northern America	2021-02-25
MW519715	15	9	3	USA	Northern America	2021-01-05
MW550525	15	9	3	USA	Northern America	2020-12-31
MW617525	15	9	3	USA	Northern America	2021-02-01
MW714597	15	9	3	USA	Northern America	2021-02
MW672709	16	9	4	USA	Northern America	2021-02-03
MW705117	16	9	4	USA	Northern America	2021-02-10
MW706079	16	9	4	USA	Northern America	2021-02-10
MW766518	16	9	4	USA	Northern America	2021-02-24
MW777034	16	9	3	USA	Northern America	2021-02-15
MW777311	16	9	3	USA	Northern America	2021-02-18
MW550576	17	9	4	USA	Northern America	2020-12-30
MW636461	17	9	4	USA	Northern America	2021-01-18
MW704580	17	9	4	USA	Northern America	2021-02-09
MW767364	17	9	4	USA	Northern America	2021-02-12
MW771737	17	9	4	USA	Northern America	2021-02-26
MW758609	18	9	5	USA	Northern America	2021-02-27
MW777580	18	9	5	USA	Northern America	2021-02-16
MW778000	18	9	5	USA	Northern America	2021-02-21
MW778768	18	9	5	USA	Northern America	2021-02-20
MW647949	18	9	4	USA	Northern America	2021-02-03
MW758732	18	9	4	USA	Northern America	2021-02-22
MW673255	18	9	3	USA	Northern America	2021-01-29
MW771888	18	9	3	USA	Northern America	2021-02-28
MW776981	18	9	3	USA	Northern America	2021-02-14
MW779823	19	9	5	USA	Northern America	2021-02-20
MT664793	19	9	4	India	Southern Asia	2020-06-11
MW596206	19	9	4	USA	Northern America	2021-01-09
MW766785	19	9	3	USA	Northern America	2021-02-13
MW723414	20	9	6	USA	Northern America	2021-02-11
MW706612	20	9	5	USA	Northern America	2021-02-10
MW719828	20	9	5	USA	Northern America	2021-02-20
MW702338	20	9	4	USA	Northern America	2021-01-04
MW719885	20	9	4	USA	Northern America	2021-02-21
MW725821	20	9	4	USA	Northern America	2021-02-22
MW725830	20	9	4	USA	Northern America	2021-02-22
MW725831	20	9	4	USA	Northern America	2021-02-22
MW646739	21	9	6	USA	Northern America	2021-01-27
MW778854	21	9	5	USA	Northern America	2021-02-21
MW309481	21	9	4	USA	Northern America	2020-08-13
MW321045	21	9	4	Australia	Australia and New Zealand	2020-07-30
MW617497	21	9	4	USA	Northern America	2021-02-02
MW702990	21	9	4	USA	Northern America	2021-01-25
MW763200	22	9	5	USA	Northern America	2021-02-08
MW241364	22	9	4	USA	Northern America	2020-10-08
MW590899	22	9	4	USA	Northern America	2021-01-18
MW617569	22	9	4	USA	Northern America	2021-01-31
MW693263	22	9	4	USA	Northern America	2021-02-10
MW758620	22	9	4	USA	Northern America	2021-02-25
MW728369	22	9	3	USA	Northern America	2021-02-21
MW728487	22	9	3	USA	Northern America	2021-02-21
MW777438	22	9	3	USA	Northern America	2021-02-18
MW640507	23	9	3	USA	Northern America	2021-01-24
MW707992	23	9	3	USA	Northern America	2021-02-12
MW694171	24	9	8	USA	Northern America	2021-02-12
MW778872	24	9	3	USA	Northern America	2021-02-22
MW420641	25	9	4	USA	Northern America	2020-10-25
MW673416	25	9	4	USA	Northern America	2021-02-09
MW693897	25	9	4	USA	Northern America	2021-02-11
MW702196	26	9	6	USA	Northern America	2020-12-24
MW681077	27	9	5	USA	Northern America	2021-01-25
MW778220	27	9	5	USA	Northern America	2021-02-16
MW673036	27	9	4	USA	Northern America	2021-02-07
MW626170	28	9	6	USA	Northern America	2021-02-03
MW693420	28	9	6	USA	Northern America	2021-02-12
MW617617	28	9	5	USA	Northern America	2021-01-30
MW693825	28	9	5	USA	Northern America	2021-02-11
MW617560	28	9	4	USA	Northern America	2021-01-30
MW693637	28	9	4	USA	Northern America	2021-02-09
MW694229	29	9	3	USA	Northern America	2021-02-12
MW583151	30	9	6	USA	Northern America	2021-01-17
MW693239	30	9	6	USA	Northern America	2021-02-08
MW738455	30	9	6	USA	Northern America	2021-01-25
MW693693	30	9	5	USA	Northern America	2021-02-10
MW693776	30	9	4	USA	Northern America	2021-02-10
MW590897	32	9	4	USA	Northern America	2021-01-18
MW693935	32	9	3	USA	Northern America	2021-02-09
MW673476	33	9	6	USA	Northern America	2021-02-08
MT886422	34	9	7	USA	Northern America	2020-04-11
MW593164	43	9	7	USA	Northern America	2020-03-16
MW524882	45	9	4	USA	Northern America	2021-01-14
MW715555	46	9	7	USA	Northern America	2021-02-19
MW369395	46	9	4	USA	Northern America	2020-08-21
MW133671	50	9	6	USA	Northern America	2020-06-05
MW474343	50	9	6	USA	Northern America	2020-11-20
MW593741	52	9	6	USA	Northern America	2020-03-25
MT439236	52	9	4	USA	Northern America	2020-03-12
MW523476	53	9	7	USA	Northern America	2020-11-24
MW739019	54	9	4	USA	Northern America	2020-06-15
MW425015	59	9	5	USA	Northern America	2020-07-08
MW080296	60	9	7	USA	Northern America	2020-05-24
MW713993	62	9	6	USA	Northern America	2020-06-28
MW420129	62	9	5	USA	Northern America	2020-08-04
MW735888	63	9	6	USA	Northern America	2021-01-24
MW739117	64	9	7	USA	Northern America	2021-01-11
MW539879	65	9	7	USA	Northern America	2020-05-14
MW698788	65	9	6	USA	Northern America	2021-02-15
MW739079	65	9	4	USA	Northern America	2020-06-23
MW701104	66	9	7	USA	Northern America	2021-01-19
MW542153	66	9	5	USA	Northern America	2021-01-12
MW681202	68	9	5	USA	Northern America	2021-02-11
MW698144	68	9	5	USA	Northern America	2021-02-11
MW720268	68	9	5	USA	Northern America	2021-02-19
MW728618	68	9	5	USA	Northern America	2021-02-20
MW583198	70	9	6	USA	Northern America	2021-01-16
MW733216	70	9	5	USA	Northern America	2021-02-25
MT451198	71	9	6	Australia	Australia and New Zealand	2020-03-23
MT451371	81	9	6	Australia	Australia and New Zealand	2020-03-24
MT451354	82	9	6	Australia	Australia and New Zealand	2020-03-23
MW721373	83	9	7	USA	Northern America	2021-02-07
MT451272	90	9	7	Australia	Australia and New Zealand	2020-03-23
MT451358	110	9	6	Australia	Australia and New Zealand	2020-03-23
MW191053	8	8	3	USA	Northern America	2020-03-13
MW155494	10	8	4	Australia	Australia and New Zealand	2020-08-12
MW155500	10	8	4	Australia	Australia and New Zealand	2020-08-16
MW156383	10	8	4	Australia	Australia and New Zealand	2020-08-25
MW156858	10	8	4	Australia	Australia and New Zealand	2020-08-20
MW185009	10	8	4	Australia	Australia and New Zealand	2020-08-19
MW565805	10	8	4	USA	Northern America	2020-09-11
MW063474	11	8	4	Iran	Southern Asia	2020-04-27
MW153427	11	8	4	Australia	Australia and New Zealand	2020-08-16
MW155071	11	8	4	Australia	Australia and New Zealand	2020-09-05
MW155503	11	8	4	Australia	Australia and New Zealand	2020-08-17
MW156254	11	8	4	Australia	Australia and New Zealand	2020-08-19
MW156384	11	8	4	Australia	Australia and New Zealand	2020-08-25
MW156860	11	8	4	Australia	Australia and New Zealand	2020-08-24
MW157166	11	8	4	Australia	Australia and New Zealand	2020-08-31
MW181518	11	8	4	USA	Northern America	2020-05-28
MW184268	11	8	4	Australia	Australia and New Zealand	2020-08-19
MW184703	11	8	4	Australia	Australia and New Zealand	2020-08-19
MW185173	11	8	4	Australia	Australia and New Zealand	2020-08-17
MW185589	11	8	4	Australia	Australia and New Zealand	2020-08-27
MW157063	12	8	4	Australia	Australia and New Zealand	2020-08-29
MW586313	12	8	4	USA	Northern America	2021-01-26
MW562760	12	8	3	USA	Northern America	2020-12-28
MW779214	12	8	2	USA	Northern America	2021-02-23
MW586531	13	8	6	USA	Northern America	2021-01-20
MW155456	13	8	4	Australia	Australia and New Zealand	2020-08-12
MW184759	13	8	4	Australia	Australia and New Zealand	2020-09-02
MW517343	13	8	4	USA	Northern America	2021-01-08
MW640587	13	8	4	USA	Northern America	2021-01-25
MW672998	13	8	4	USA	Northern America	2021-02-07
MW562687	13	8	3	USA	Northern America	2020-12-28
MW672761	13	8	2	USA	Northern America	2021-02-04
MW766457	14	8	5	USA	Northern America	2021-02-05
MW643761	14	8	4	USA	Northern America	2021-01-31
MW643762	14	8	4	USA	Northern America	2021-01-31
MW702756	14	8	4	USA	Northern America	2021-01-14
MW766422	14	8	3	USA	Northern America	2021-02-17
MW704795	14	8	2	USA	Northern America	2021-02-10
MW777348	14	8	2	USA	Northern America	2021-02-18
MW704448	15	8	6	USA	Northern America	2021-02-24
MW704450	15	8	6	USA	Northern America	2021-02-25
MW704451	15	8	6	USA	Northern America	2021-02-25
MW704452	15	8	6	USA	Northern America	2021-02-25
MW713627	15	8	6	USA	Northern America	2021-02-25
MW713628	15	8	6	USA	Northern America	2021-02-25
MW713629	15	8	6	USA	Northern America	2021-02-25
MW713630	15	8	6	USA	Northern America	2021-02-25
MW713631	15	8	6	USA	Northern America	2021-02-25
MW751586	15	8	6	USA	Northern America	2021-03-04
MW496082	15	8	5	USA	Northern America	2020-12-03
MW778665	15	8	5	USA	Northern America	2021-02-22
MW634126	15	8	4	USA	Northern America	2020-12-26
MW749425	15	8	4	USA	Northern America	2021-02-22
MW778141	15	8	4	USA	Northern America	2021-02-19
MT890235	15	8	3	Ghana	Western Africa	2020-05-25
MW505099	15	8	3	USA	Northern America	2020-12-16
MW684704	15	8	3	USA	Northern America	2021-02-10
MW704484	15	8	3	USA	Northern America	2021-02-05
MW706379	15	8	3	USA	Northern America	2021-02-11
MW708447	15	8	3	USA	Northern America	2021-01-13
MW778326	15	8	3	USA	Northern America	2021-02-15
MW778949	15	8	3	USA	Northern America	2021-02-22
MW767333	15	8	2	USA	Northern America	2021-02-14
MW533280	16	8	6	Egypt	Northern Africa	2021-01-09
MW687164	16	8	6	USA	Northern America	2021-02-19
MW704449	16	8	6	USA	Northern America	2021-02-25
MW704453	16	8	6	USA	Northern America	2021-02-25
MW704456	16	8	6	USA	Northern America	2021-02-24
MW713625	16	8	6	USA	Northern America	2021-02-24
MW713640	16	8	6	USA	Northern America	2021-02-26
MW750083	16	8	6	USA	Northern America	2021-02-15
MW751579	16	8	6	USA	Northern America	2021-03-04
MW640364	16	8	4	USA	Northern America	2021-01-22
MW640414	16	8	4	USA	Northern America	2021-01-24
MW766878	16	8	4	USA	Northern America	2021-01-24
MW673393	16	8	3	USA	Northern America	2021-02-07
MW689741	16	8	3	USA	Northern America	2021-02-04
MW694039	16	8	3	USA	Northern America	2021-02-11
MW734125	16	8	3	USA	Northern America	2021-02-22
MW750972	16	8	3	USA	Northern America	2021-01-24
MW771993	16	8	3	USA	Northern America	2021-02-27
MW777445	16	8	3	USA	Northern America	2021-02-19
MW783277	16	8	3	USA	Northern America	2021-02-28
MW764035	16	8	2	USA	Northern America	2021-03-01
MW644011	17	8	6	USA	Northern America	2021-02-01
MW751580	17	8	6	USA	Northern America	2021-03-04
MW751630	17	8	6	USA	Northern America	2021-03-08
MW673271	17	8	5	USA	Northern America	2021-01-29
MW767279	17	8	5	USA	Northern America	2021-02-12
MW581599	17	8	4	USA	Northern America	2020-12-26
MW582273	17	8	4	USA	Northern America	2020-12-27
MW671689	17	8	4	USA	Northern America	2021-01-31
MW719570	17	8	4	USA	Northern America	2020-12-26
MW773369	17	8	4	USA	Northern America	2021-03-06
MW780890	17	8	4	USA	Northern America	2021-03-01
MW545317	17	8	3	USA	Northern America	2021-01-08
MW749541	17	8	3	USA	Northern America	2021-02-25
MW766705	17	8	3	USA	Northern America	2021-02-19
MW694009	17	8	2	USA	Northern America	2021-02-11
MW749233	17	8	2	USA	Northern America	2021-02-24
MW777814	17	8	2	USA	Northern America	2021-02-16
MW778643	17	8	2	USA	Northern America	2021-02-21
MW779185	17	8	2	USA	Northern America	2021-02-23
MW781874	18	8	6	USA	Northern America	2021-03-07
MW734568	18	8	5	USA	Northern America	2021-02-22
MW779793	18	8	5	USA	Northern America	2021-03-04
MW545294	18	8	4	USA	Northern America	2021-01-09
MW640092	18	8	4	USA	Northern America	2021-01-21
MW645615	18	8	4	USA	Northern America	2020-11-20
MW665622	18	8	4	USA	Northern America	2021-01-29
MW665846	18	8	4	USA	Northern America	2021-02-01
MW696415	18	8	4	USA	Northern America	2021-02-09
MW760179	18	8	4	USA	Northern America	2021-02-23
MW766738	18	8	4	USA	Northern America	2021-02-25
MW548895	18	8	3	USA	Northern America	2020-12-04
MW636922	18	8	3	USA	Northern America	2021-01-19
MW671641	18	8	3	USA	Northern America	2021-02-01
MW766709	18	8	3	USA	Northern America	2021-02-12
MW777392	18	8	3	USA	Northern America	2021-02-18
MW780687	18	8	3	USA	Northern America	2021-02-26
MW708198	18	8	2	USA	Northern America	2021-01-21
MW673251	19	8	5	USA	Northern America	2021-01-29
MW707650	19	8	5	USA	Northern America	2021-02-16
MW582239	19	8	4	USA	Northern America	2020-12-26
MW582243	19	8	4	USA	Northern America	2020-12-26
MW582251	19	8	3	USA	Northern America	2020-12-23
MW636924	19	8	3	USA	Northern America	2021-01-19
MW694026	19	8	3	USA	Northern America	2021-02-12
MW705940	19	8	3	USA	Northern America	2021-02-10
MW730982	19	8	3	USA	Northern America	2021-01-07
MW730984	19	8	3	USA	Northern America	2021-01-07
MW730985	19	8	3	USA	Northern America	2021-01-07
MW766804	19	8	3	USA	Northern America	2021-02-19
MW783385	19	8	3	USA	Northern America	2021-02-27
MW629289	20	8	5	USA	Northern America	2021-01-19
MW673051	20	8	5	USA	Northern America	2021-02-06
MW700335	20	8	5	USA	Northern America	2021-01-30
MW700337	20	8	5	USA	Northern America	2021-01-30
MW700338	20	8	5	USA	Northern America	2021-01-30
MW763761	20	8	5	USA	Northern America	2021-03-02
MW773276	20	8	5	USA	Northern America	2021-03-02
MW715283	20	8	4	USA	Northern America	2021-02-24
MW736815	20	8	4	USA	Northern America	2020-12-15
MW782801	20	8	4	USA	Northern America	2021-03-04
MW485139	20	8	3	USA	Northern America	2020-12-22
MW669522	20	8	3	USA	Northern America	2021-02-05
MW672716	20	8	3	USA	Northern America	2021-02-02
MW730983	20	8	3	USA	Northern America	2021-01-07
MW779265	20	8	3	USA	Northern America	2021-02-24
MW737942	20	8	2	USA	Northern America	2021-02-03
MT632565	21	8	6	USA	Northern America	2020-03-06
MW519863	21	8	5	USA	Northern America	2021-01-02
MW629243	21	8	5	USA	Northern America	2021-01-16
MW741636	21	8	5	USA	Northern America	2020-11-07
MW777862	21	8	5	USA	Northern America	2021-02-16
MW782814	21	8	5	USA	Northern America	2021-03-05
MW705014	21	8	4	USA	Northern America	2021-02-11
MW739514	21	8	4	USA	Northern America	2021-01-21
MW779240	21	8	4	USA	Northern America	2021-02-24
MW693572	21	8	3	USA	Northern America	2021-02-10
MW697008	21	8	3	USA	Northern America	2021-02-16
MW715206	21	8	3	USA	Northern America	2021-02-16
MW730981	21	8	3	USA	Northern America	2021-01-07
MW736696	21	8	3	USA	Northern America	2021-01-11
MW737935	21	8	2	USA	Northern America	2021-02-03
MW726074	22	8	6	USA	Northern America	2021-02-24
MW719900	22	8	5	USA	Northern America	2021-02-21
MW694216	22	8	4	USA	Northern America	2021-02-12
MW719697	22	8	4	USA	Northern America	2021-02-13
MW763659	22	8	4	USA	Northern America	2021-02-25
MW673380	23	8	9	USA	Northern America	2021-02-07
MW549670	23	8	3	USA	Northern America	2021-01-09
MW779153	23	8	3	USA	Northern America	2021-02-22
MW693505	24	8	6	USA	Northern America	2021-02-10
MW713650	24	8	5	USA	Northern America	2021-02-10
MW715496	24	8	5	USA	Northern America	2021-02-08
MW549663	24	8	4	USA	Northern America	2021-01-09
MW693495	24	8	4	USA	Northern America	2021-02-09
MW693436	25	8	5	USA	Northern America	2021-02-10
MW777841	25	8	5	USA	Northern America	2021-02-16
MW549693	25	8	4	USA	Northern America	2020-12-26
MW687313	25	8	3	USA	Northern America	2021-02-05
MW403718	26	8	6	USA	Northern America	2020-06-20
MT810759	27	8	5	Mexico	Central America	2020-04-28
MW673105	27	8	5	USA	Northern America	2021-02-08
MW646706	27	8	4	USA	Northern America	2021-02-05
MW673041	27	8	4	USA	Northern America	2021-02-07
MW673119	27	8	4	USA	Northern America	2021-02-08
MW749490	27	8	4	USA	Northern America	2021-02-25
MW777471	27	8	4	USA	Northern America	2021-02-19
MW555959	27	8	3	USA	Northern America	2021-01-18
MW591273	28	8	6	USA	Northern America	2021-01-18
MW672693	28	8	5	USA	Northern America	2021-02-02
MW681536	28	8	3	USA	Northern America	2021-02-10
MW631816	29	8	6	USA	Northern America	2021-02-06
MW687411	29	8	6	USA	Northern America	2021-01-04
MW693843	29	8	6	USA	Northern America	2021-02-11
MW694161	29	8	6	USA	Northern America	2021-02-12
MW421920	29	8	4	USA	Northern America	2020-06-17
MW739243	29	8	3	USA	Northern America	2020-12-18
MT635241	30	8	6	USA	Northern America	2020-03-23
MW758726	30	8	5	USA	Northern America	2021-02-22
MW673224	31	8	6	USA	Northern America	2021-01-29
MW518127	31	8	3	USA	Northern America	2021-01-03
MW693892	33	8	8	USA	Northern America	2021-02-10
MW752044	33	8	6	USA	Northern America	2021-02-11
MW673453	34	8	5	USA	Northern America	2021-02-09
MW724765	34	8	5	USA	Northern America	2020-06-24
MW752009	34	8	5	USA	Northern America	2021-02-15
MW672983	36	8	5	USA	Northern America	2021-02-06
MW721397	37	8	3	USA	Northern America	2021-02-09
MW721379	38	8	6	USA	Northern America	2021-02-09
MW715507	39	8	7	USA	Northern America	2021-02-15
MW672968	39	8	5	USA	Northern America	2021-02-07
MW725858	40	8	4	USA	Northern America	2021-02-24
MW715536	44	8	8	USA	Northern America	2021-02-17
MW349149	47	8	5	USA	Northern America	2020-06-22
MW190118	48	8	6	USA	Northern America	2020-06-07
MT506638	49	8	5	USA	Northern America	2020-03-16
MW474289	49	8	5	USA	Northern America	2020-11-16
MT612268	50	8	6	Australia	Australia and New Zealand	2020-05-17
MW750911	50	8	6	USA	Northern America	2021-03-01
MW369383	51	8	6	USA	Northern America	2020-06-08
MW369367	52	8	5	USA	Northern America	2020-06-22
MW549577	54	8	5	USA	Northern America	2021-01-05
MT506637	55	8	5	USA	Northern America	2020-03-12
MW406725	55	8	5	USA	Northern America	2020-06-24
MW369342	56	8	5	USA	Northern America	2020-06-22
MW687251	56	8	5	USA	Northern America	2021-02-08
MW474232	57	8	4	USA	Northern America	2020-11-09
MW269949	58	8	6	USA	Northern America	2020-03-29
MT886420	58	8	5	USA	Northern America	2020-04-10
MT886432	58	8	5	USA	Northern America	2020-04-16
MT886439	58	8	5	USA	Northern America	2020-03-21
MW565384	59	8	5	USA	Northern America	2020-11-11
MW626202	59	8	5	USA	Northern America	2021-02-02
MW735895	59	8	5	USA	Northern America	2020-06-12
MW739038	59	8	5	USA	Northern America	2020-06-15
MT585078	60	8	5	USA	Northern America	2020-04-30
MW276541	60	8	5	USA	Northern America	2020-07-16
MW565718	61	8	5	USA	Northern America	2020-08-17
MW646012	62	8	5	USA	Northern America	2020-09-16
MW505469	63	8	5	USA	Northern America	2021-01-06
MW646685	63	8	5	USA	Northern America	2021-02-02
MW751035	64	8	5	USA	Northern America	2021-01-19
MW406708	65	8	6	USA	Northern America	2020-06-24
MW617827	65	8	5	USA	Northern America	2021-01-19
MT439257	66	8	5	USA	Northern America	2020-03-20
MW506888	66	8	5	USA	Northern America	2021-01-07
MW685603	66	8	5	USA	Northern America	2021-01-12
MW134520	67	8	7	USA	Northern America	2020-07-19
MW578157	68	8	5	USA	Northern America	2021-01-15
MW617683	68	8	5	USA	Northern America	2021-01-20
MW719984	69	8	5	USA	Northern America	2021-02-17
MW521614	70	8	5	USA	Northern America	2020-11-30
MT451504	71	8	6	Australia	Australia and New Zealand	2020-03-29
MT834215	72	8	7	USA	Northern America	2020-05-25
MW521653	72	8	5	USA	Northern America	2020-12-30
MW689158	74	8	5	USA	Northern America	2021-02-10
MW493949	91	8	4	USA	Northern America	2020-11-28
MT451266	95	8	5	Australia	Australia and New Zealand	2020-03-22
MT451393	101	8	8	Australia	Australia and New Zealand	2020-03-26
MT451357	112	8	6	Australia	Australia and New Zealand	2020-03-23
MT451289	213	8	6	Australia	Australia and New Zealand	2020-03-26
MT704312	8	7	5	USA	Northern America	2020-04-04
MT831341	9	7	6	USA	Northern America	2020-06-08
MT969863	9	7	4	Australia	Australia and New Zealand	2020-07-13
MW564753	10	7	7	USA	Northern America	2020-09-18
MT704311	10	7	5	USA	Northern America	2020-04-04
MW154296	10	7	4	Australia	Australia and New Zealand	2020-07-22
MW154542	10	7	4	Australia	Australia and New Zealand	2020-08-04
MT969766	10	7	3	Australia	Australia and New Zealand	2020-07-08
MT972177	10	7	3	Australia	Australia and New Zealand	2020-06-23
MW156303	10	7	3	Australia	Australia and New Zealand	2020-07-25
MW156660	10	7	3	Australia	Australia and New Zealand	2020-08-01
MW185349	10	7	3	Australia	Australia and New Zealand	2020-07-23
MW277598	10	7	3	Australia	Australia and New Zealand	2020
MW636812	10	7	3	USA	Northern America	2021-01-19
MW420011	11	7	5	USA	Northern America	2020-06-23
MW592772	11	7	4	USA	Northern America	2020-12-29
MW640543	11	7	3	USA	Northern America	2021-01-25
MW706702	11	7	2	USA	Northern America	2021-02-11
MW734471	11	7	2	USA	Northern America	2021-02-22
MW540155	12	7	6	USA	Northern America	2020-11-28
MW565168	12	7	6	USA	Northern America	2020-11-18
MW667322	12	7	6	USA	Northern America	2021-01-27
MW420026	12	7	5	USA	Northern America	2020-06-23
MT969864	12	7	4	Australia	Australia and New Zealand	2020-07-13
MW154680	12	7	4	Australia	Australia and New Zealand	2020-07-29
MW638913	12	7	4	USA	Northern America	2021-01-09
MW666919	12	7	4	USA	Northern America	2021-01-25
MW763474	12	7	4	USA	Northern America	2021-02-27
MW778664	12	7	4	USA	Northern America	2021-02-23
MT873242	12	7	3	USA	Northern America	2020-05-06
MW424876	12	7	3	USA	Northern America	2020-12-20
MW454414	12	7	3	USA	Northern America	2020-12-12
MW636368	12	7	3	USA	Northern America	2021-01-16
MW702820	12	7	3	USA	Northern America	2020-12-20
MW734159	12	7	3	USA	Northern America	2021-02-19
MW777909	12	7	3	USA	Northern America	2021-02-19
MW777702	12	7	2	USA	Northern America	2021-02-17
MW155295	13	7	5	Australia	Australia and New Zealand	2020-09-13
MW636616	13	7	5	USA	Northern America	2021-01-17
MW696325	13	7	5	USA	Northern America	2021-02-08
MW700650	13	7	5	USA	Northern America	2021-01-11
MW741974	13	7	5	USA	Northern America	2021-01-27
MW483243	13	7	4	USA	Northern America	2020-06-21
MW666296	13	7	4	USA	Northern America	2021-02-02
MW689919	13	7	4	USA	Northern America	2021-01-29
MW702079	13	7	4	USA	Northern America	2020-12-28
MW776910	13	7	4	USA	Northern America	2021-02-17
MW638377	13	7	3	USA	Northern America	2021-01-12
MW668812	13	7	3	USA	Northern America	2021-02-02
MW701184	13	7	3	USA	Northern America	2020-12-29
MW719674	13	7	3	USA	Northern America	2021-02-13
MW781278	13	7	3	USA	Northern America	2021-03-05
MW782923	13	7	3	USA	Northern America	2021-03-04
MW545484	13	7	2	USA	Northern America	2021-01-06
MW702075	13	7	2	USA	Northern America	2020-12-28
MW739430	13	7	2	USA	Northern America	2021-01-30
MW739431	13	7	2	USA	Northern America	2021-01-30
MW640350	14	7	5	USA	Northern America	2021-01-21
MW739515	14	7	5	USA	Northern America	2021-01-21
MW766636	14	7	5	USA	Northern America	2021-02-05
MW767210	14	7	5	USA	Northern America	2021-02-14
MW778348	14	7	5	USA	Northern America	2021-02-18
MW306350	14	7	4	USA	Northern America	2020-10-14
MW578018	14	7	4	USA	Northern America	2020-06-13
MW634319	14	7	4	USA	Northern America	2020-12-26
MW666838	14	7	4	USA	Northern America	2021-01-25
MW672760	14	7	4	USA	Northern America	2021-02-04
MW706116	14	7	4	USA	Northern America	2021-02-10
MW708754	14	7	4	USA	Northern America	2021-01-26
MW731293	14	7	4	USA	Northern America	2021-02-08
MW749378	14	7	4	USA	Northern America	2021-02-24
MW766805	14	7	4	USA	Northern America	2021-02-16
MW766806	14	7	4	USA	Northern America	2021-02-16
MW771866	14	7	4	USA	Northern America	2021-03-01
MW773388	14	7	4	USA	Northern America	2021-03-02
MW779147	14	7	4	USA	Northern America	2021-02-22
MW780885	14	7	4	USA	Northern America	2021-03-02
MW181546	14	7	3	USA	Northern America	2020-05-29
MW585957	14	7	3	USA	Northern America	2021-01-17
MW700504	14	7	3	USA	Northern America	2020-12-09
MW701210	14	7	3	USA	Northern America	2020-12-29
MW708800	14	7	3	USA	Northern America	2021-01-25
MW720487	14	7	3	USA	Northern America	2021-02-18
MW739415	14	7	3	USA	Northern America	2021-02-02
MW766794	14	7	3	USA	Northern America	2021-02-16
MW780532	14	7	3	USA	Northern America	2021-02-26
MW596028	14	7	2	USA	Northern America	2021-01-29
MW714588	14	7	2	USA	Northern America	2021-02
MW714596	14	7	2	USA	Northern America	2021-02
MW714598	14	7	2	USA	Northern America	2021-02
MW714599	14	7	2	USA	Northern America	2021-02
MW720368	14	7	2	USA	Northern America	2021-02-18
MW738377	14	7	2	USA	Northern America	2021-01-04
MW752943	14	7	2	USA	Northern America	2021-02-23
MW777168	14	7	2	USA	Northern America	2021-02-14
MW778299	14	7	2	USA	Northern America	2021-02-17
MW781506	14	7	2	USA	Northern America	2021-03-02
MW781567	14	7	2	USA	Northern America	2021-03-03
MW460610	15	7	5	USA	Northern America	2020-12-26
MW702206	15	7	5	USA	Northern America	2020-12-28
MW737982	15	7	5	USA	Northern America	2021-01-21
MW758825	15	7	5	USA	Northern America	2021-02-24
MW777064	15	7	5	USA	Northern America	2021-02-16
MW578126	15	7	4	USA	Northern America	2021-01-15
MW586258	15	7	4	USA	Northern America	2021-01-27
MW586576	15	7	4	USA	Northern America	2021-01-19
MW631843	15	7	4	USA	Northern America	2021-02-06
MW640337	15	7	4	USA	Northern America	2021-01-21
MW693553	15	7	4	USA	Northern America	2021-02-09
MW700474	15	7	4	USA	Northern America	2020-11-09
MW702208	15	7	4	USA	Northern America	2020-12-28
MW702763	15	7	4	USA	Northern America	2021-01-14
MW731004	15	7	4	USA	Northern America	2021-01-08
MW731294	15	7	4	USA	Northern America	2021-02-09
MW758573	15	7	4	USA	Northern America	2021-02-25
MW777010	15	7	4	USA	Northern America	2021-02-15
MW777215	15	7	4	USA	Northern America	2021-02-13
MW777237	15	7	4	USA	Northern America	2021-02-11
MW778386	15	7	4	USA	Northern America	2021-02-16
MW550543	15	7	3	USA	Northern America	2020-12-29
MW586436	15	7	3	USA	Northern America	2021-01-23
MW586749	15	7	3	USA	Northern America	2021-01-13
MW587775	15	7	3	USA	Northern America	2021-01-26
MW629010	15	7	3	USA	Northern America	2021-01-29
MW642482	15	7	3	USA	Northern America	2021-01-25
MW669544	15	7	3	USA	Northern America	2021-02-04
MW692960	15	7	3	USA	Northern America	2021-02-06
MW696749	15	7	3	USA	Northern America	2021-02-15
MW700473	15	7	3	USA	Northern America	2020-11-10
MW701898	15	7	3	USA	Northern America	2020-12-02
MW708249	15	7	3	USA	Northern America	2021-01-19
MW708594	15	7	3	USA	Northern America	2021-01-16
MW708606	15	7	3	USA	Northern America	2021-01-16
MW763451	15	7	3	USA	Northern America	2021-02-27
MW766566	15	7	3	USA	Northern America	2021-02-23
MW766586	15	7	3	USA	Northern America	2021-02-26
MW777203	15	7	3	USA	Northern America	2021-02-12
MW779027	15	7	3	USA	Northern America	2021-02-22
MW681529	15	7	2	USA	Northern America	2021-02-11
MW725729	15	7	2	USA	Northern America	2021-02-16
MW741969	15	7	2	USA	Northern America	2021-01-27
MW773395	15	7	2	USA	Northern America	2021-03-04
MW779264	15	7	2	USA	Northern America	2021-02-24
MW693393	16	7	6	USA	Northern America	2021-02-09
MT641674	16	7	5	Australia	Australia and New Zealand	2020-03-26
MW528765	16	7	5	USA	Northern America	2021-01-15
MW565088	16	7	5	USA	Northern America	2020-11-18
MW596007	16	7	5	USA	Northern America	2021-01-29
MW673203	16	7	5	USA	Northern America	2021-01-29
MW739432	16	7	5	USA	Northern America	2021-01-30
MW777691	16	7	5	USA	Northern America	2021-02-16
MW566207	16	7	4	USA	Northern America	2021-01-04
MW566240	16	7	4	USA	Northern America	2020-12-29
MW631840	16	7	4	USA	Northern America	2021-02-07
MW693580	16	7	4	USA	Northern America	2021-02-09
MW694140	16	7	4	USA	Northern America	2021-02-11
MW702109	16	7	4	USA	Northern America	2020-12-22
MW705123	16	7	4	USA	Northern America	2021-02-08
MW708785	16	7	4	USA	Northern America	2021-02-04
MW728688	16	7	4	USA	Northern America	2021-02-16
MW734854	16	7	4	USA	Northern America	2021-02-20
MW758769	16	7	4	USA	Northern America	2021-02-24
MW777039	16	7	4	USA	Northern America	2021-02-14
MW779013	16	7	4	USA	Northern America	2021-02-21
MW783086	16	7	4	USA	Northern America	2021-02-25
MW184647	16	7	3	Australia	Australia and New Zealand	2020-08-09
MW485913	16	7	3	USA	Northern America	2021-01-06
MW523792	16	7	3	USA	Northern America	2021-01-06
MW586300	16	7	3	USA	Northern America	2021-01-26
MW586447	16	7	3	USA	Northern America	2021-01-21
MW642014	16	7	3	USA	Northern America	2021-01-24
MW642015	16	7	3	USA	Northern America	2021-01-24
MW666449	16	7	3	USA	Northern America	2021-01-31
MW669409	16	7	3	USA	Northern America	2021-02-08
MW669647	16	7	3	USA	Northern America	2021-02-10
MW673093	16	7	3	USA	Northern America	2021-02-08
MW685573	16	7	3	USA	Northern America	2021-01-21
MW689101	16	7	3	USA	Northern America	2021-02-16
MW696943	16	7	3	USA	Northern America	2021-02-09
MW702867	16	7	3	USA	Northern America	2020-12-16
MW704601	16	7	3	USA	Northern America	2021-02-09
MW708607	16	7	3	USA	Northern America	2021-01-19
MW731234	16	7	3	USA	Northern America	2021-02-02
MW758821	16	7	3	USA	Northern America	2021-02-24
MW758869	16	7	3	USA	Northern America	2021-02-24
MW766617	16	7	3	USA	Northern America	2021-02-17
MW768046	16	7	3	USA	Northern America	2021-02-26
MW771799	16	7	3	USA	Northern America	2021-02-26
MW772026	16	7	3	USA	Northern America	2021-02-28
MW778864	16	7	3	USA	Northern America	2021-02-21
MW781051	16	7	3	USA	Northern America	2021-02-24
MW783378	16	7	3	USA	Northern America	2021-03-01
MW643586	16	7	2	USA	Northern America	2021-01-29
MW707356	16	7	2	USA	Northern America	2021-02-12
MW776775	16	7	2	USA	Northern America	2021-03-04
MW778723	16	7	2	USA	Northern America	2021-02-20
MW666595	17	7	7	USA	Northern America	2021-02-01
MW693835	17	7	7	USA	Northern America	2021-02-11
MW634367	17	7	6	USA	Northern America	2020-12-24
MW636877	17	7	5	USA	Northern America	2021-01-20
MW640601	17	7	5	USA	Northern America	2021-01-25
MW640602	17	7	5	USA	Northern America	2021-01-25
MW693400	17	7	5	USA	Northern America	2021-02-09
MW696669	17	7	5	USA	Northern America	2021-02-16
MW736683	17	7	5	USA	Northern America	2021-01-16
MW737951	17	7	5	USA	Northern America	2021-02-03
MW739132	17	7	5	USA	Northern America	2021-01-10
MW739547	17	7	5	USA	Northern America	2021-01-16
MW763113	17	7	5	USA	Northern America	2021-01-28
MW779127	17	7	5	USA	Northern America	2021-02-22
MW779343	17	7	5	USA	Northern America	2021-02-22
MW184856	17	7	4	Australia	Australia and New Zealand	2020-08-11
MW566220	17	7	4	USA	Northern America	2021-01-04
MW592650	17	7	4	USA	Northern America	2021-02-02
MW636418	17	7	4	USA	Northern America	2021-01-17
MW692964	17	7	4	USA	Northern America	2021-02-09
MW693583	17	7	4	USA	Northern America	2021-02-09
MW696348	17	7	4	USA	Northern America	2021-02-09
MW703021	17	7	4	USA	Northern America	2021-01-18
MW708782	17	7	4	USA	Northern America	2021-02-04
MW708783	17	7	4	USA	Northern America	2021-02-04
MW733461	17	7	4	USA	Northern America	2021-02-22
MW528798	17	7	3	USA	Northern America	2021-01-15
MW548924	17	7	3	USA	Northern America	2021-01-11
MW549988	17	7	3	USA	Northern America	2021-01-08
MW550120	17	7	3	USA	Northern America	2021-01-07
MW586818	17	7	3	USA	Northern America	2021-01-14
MW671589	17	7	3	USA	Northern America	2021-01-31
MW674262	17	7	3	USA	Northern America	2021-02-13
MW693836	17	7	3	USA	Northern America	2021-02-12
MW707908	17	7	3	USA	Northern America	2021-02-14
MW715224	17	7	3	USA	Northern America	2021-02-19
MW720229	17	7	3	USA	Northern America	2021-02-15
MW726049	17	7	3	USA	Northern America	2021-02-16
MW736851	17	7	3	USA	Northern America	2021-01-27
MW758768	17	7	3	USA	Northern America	2021-02-24
MW758816	17	7	3	USA	Northern America	2021-02-25
MW766658	17	7	3	USA	Northern America	2021-02-17
MW767347	17	7	3	USA	Northern America	2021-02-12
MW771724	17	7	3	USA	Northern America	2021-02-26
MW778660	17	7	3	USA	Northern America	2021-02-21
MW779262	17	7	3	USA	Northern America	2021-02-23
MW781513	17	7	3	USA	Northern America	2021-03-02
MW681530	17	7	2	USA	Northern America	2021-02-11
MW719769	17	7	2	USA	Northern America	2021-02-18
MW738463	17	7	2	USA	Northern America	2021-01-13
MW752063	17	7	2	USA	Northern America	2021-02-13
MW783114	17	7	2	USA	Northern America	2021-03-02
MW504772	18	7	7	Egypt	Northern Africa	2020-12-25
MW705849	18	7	6	USA	Northern America	2021-02-09
MW596045	18	7	5	USA	Northern America	2021-01-28
MW629341	18	7	5	USA	Northern America	2021-01-06
MW638323	18	7	5	USA	Northern America	2021-01-11
MW661006	18	7	5	USA	Northern America	2020-11-15
MW667190	18	7	5	USA	Northern America	2021-01-25
MW669552	18	7	5	USA	Northern America	2021-02-08
MW737950	18	7	5	USA	Northern America	2021-02-03
MW741623	18	7	5	USA	Northern America	2020-11-07
MW420443	18	7	4	USA	Northern America	2020-10-20
MW454770	18	7	4	USA	Northern America	2020-12-01
MW566235	18	7	4	USA	Northern America	2020-12-29
MW586796	18	7	4	USA	Northern America	2021-01-13
MW696930	18	7	4	USA	Northern America	2021-02-10
MW702764	18	7	4	USA	Northern America	2021-01-14
MW707740	18	7	4	USA	Northern America	2021-02-12
MW739858	18	7	4	USA	Northern America	2021-02-05
MW772082	18	7	4	USA	Northern America	2021-02-27
MW778403	18	7	4	USA	Northern America	2021-02-18
MW550669	18	7	3	USA	Northern America	2021-01-01
MW586737	18	7	3	USA	Northern America	2021-01-10
MW648321	18	7	3	USA	Northern America	2021-02-04
MW664416	18	7	3	USA	Northern America	2021-02-17
MW666569	18	7	3	USA	Northern America	2021-02-01
MW685771	18	7	3	USA	Northern America	2021-02-08
MW706088	18	7	3	USA	Northern America	2021-02-10
MW725952	18	7	3	USA	Northern America	2021-03-01
MW731134	18	7	3	USA	Northern America	2021-02-11
MW763663	18	7	3	USA	Northern America	2021-02-26
MW777614	18	7	3	USA	Northern America	2021-02-17
MW778958	18	7	3	USA	Northern America	2021-02-21
MW779806	18	7	3	USA	Northern America	2021-03-03
MW643466	18	7	2	USA	Northern America	2021-01-30
MW741587	18	7	2	USA	Northern America	2021-02-18
MW696705	19	7	7	USA	Northern America	2021-02-11
MW693901	19	7	6	USA	Northern America	2021-02-10
MW540263	19	7	5	USA	Northern America	2020-12-27
MW702994	19	7	5	USA	Northern America	2021-01-19
MW720070	19	7	5	USA	Northern America	2021-02-17
MW751999	19	7	5	USA	Northern America	2021-02-16
MW752000	19	7	5	USA	Northern America	2021-02-16
MW752001	19	7	5	USA	Northern America	2021-02-16
MW752002	19	7	5	USA	Northern America	2021-02-16
MW134006	19	7	4	USA	Northern America	2020-06-23
MW578119	19	7	4	USA	Northern America	2021-01-15
MW593084	19	7	4	USA	Northern America	2021-01-14
MW640810	19	7	4	USA	Northern America	2021-01-25
MW672671	19	7	4	USA	Northern America	2021-02-02
MW708700	19	7	4	USA	Northern America	2021-01-25
MW720097	19	7	4	USA	Northern America	2021-02-17
MW737864	19	7	4	USA	Northern America	2021-02-05
MW738158	19	7	4	USA	Northern America	2020-12-14
MW738313	19	7	4	USA	Northern America	2020-12-31
MW738317	19	7	4	USA	Northern America	2020-12-31
MW777424	19	7	4	USA	Northern America	2021-02-18
MW777430	19	7	4	USA	Northern America	2021-02-16
MW778298	19	7	4	USA	Northern America	2021-02-17
MW155464	19	7	3	Australia	Australia and New Zealand	2020-08-13
MW582242	19	7	3	USA	Northern America	2020-12-26
MW589575	19	7	3	USA	Northern America	2021-01-09
MW629511	19	7	3	USA	Northern America	2021-01-27
MW642016	19	7	3	USA	Northern America	2021-01-24
MW689869	19	7	3	USA	Northern America	2021-02-05
MW693829	19	7	3	USA	Northern America	2021-02-11
MW700410	19	7	3	USA	Northern America	2020-12-29
MW708260	19	7	3	USA	Northern America	2021-01-11
MW708392	19	7	3	USA	Northern America	2021-02-01
MW731418	19	7	3	USA	Northern America	2021-02-15
MW731430	19	7	3	USA	Northern America	2021-02-18
MW739723	19	7	3	USA	Northern America	2021-01-28
MW739799	19	7	3	USA	Northern America	2021-01-15
MW766558	19	7	3	USA	Northern America	2021-02-08
MW766559	19	7	3	USA	Northern America	2021-02-08
MW766560	19	7	3	USA	Northern America	2021-02-08
MW766561	19	7	3	USA	Northern America	2021-02-08
MW766562	19	7	3	USA	Northern America	2021-02-08
MW771874	19	7	3	USA	Northern America	2021-02-28
MW772132	19	7	3	USA	Northern America	2021-02-28
MW781607	19	7	3	USA	Northern America	2021-03-03
MW733705	19	7	2	USA	Northern America	2021-02-20
MW771857	19	7	2	USA	Northern America	2021-02-28
MW495065	20	7	7	Egypt	Northern Africa	2020-12-25
MW643685	20	7	6	USA	Northern America	2021-01-30
MW332241	20	7	5	Russia	Eastern Europe	2020-08-11
MW599520	20	7	5	USA	Northern America	2021-01-08
MW631889	20	7	5	USA	Northern America	2021-02-07
MW669700	20	7	5	USA	Northern America	2021-02-11
MW689876	20	7	5	USA	Northern America	2021-02-05
MW696503	20	7	5	USA	Northern America	2021-02-10
MW725604	20	7	5	USA	Northern America	2021-02-21
MW777634	20	7	5	USA	Northern America	2021-02-15
MW154489	20	7	4	Australia	Australia and New Zealand	2020-08-11
MW495211	20	7	4	USA	Northern America	2021-01-05
MW666644	20	7	4	USA	Northern America	2021-02-01
MW669335	20	7	4	USA	Northern America	2021-02-08
MW728629	20	7	4	USA	Northern America	2021-02-20
MW773357	20	7	4	USA	Northern America	2021-03-01
MW586519	20	7	3	USA	Northern America	2021-01-20
MW666434	20	7	3	USA	Northern America	2021-01-30
MW681555	20	7	3	USA	Northern America	2021-02-11
MW693593	20	7	3	USA	Northern America	2021-02-09
MW763653	20	7	3	USA	Northern America	2021-02-26
MW766570	20	7	3	USA	Northern America	2021-02-08
MW783286	20	7	3	USA	Northern America	2021-03-02
MW583205	20	7	2	USA	Northern America	2021-01-16
MW748099	20	7	2	USA	Northern America	2021-02-04
MW666540	21	7	6	USA	Northern America	2021-01-31
MW773303	21	7	6	USA	Northern America	2021-03-02
MW549233	21	7	5	USA	Northern America	2020-12-30
MW669068	21	7	5	USA	Northern America	2021-02-03
MW669688	21	7	5	USA	Northern America	2021-02-09
MW739405	21	7	5	USA	Northern America	2021-02-03
MW778392	21	7	5	USA	Northern America	2021-02-18
MW550553	21	7	4	USA	Northern America	2020-12-30
MW617536	21	7	4	USA	Northern America	2021-02-01
MW631731	21	7	4	USA	Northern America	2021-02-05
MW638547	21	7	4	USA	Northern America	2021-01-02
MW650118	21	7	4	USA	Northern America	2021-02-01
MW665767	21	7	4	USA	Northern America	2021-01-29
MW673375	21	7	4	USA	Northern America	2021-02-07
MW673702	21	7	4	USA	Northern America	2021-01
MW693586	21	7	4	USA	Northern America	2021-02-10
MW726041	21	7	4	USA	Northern America	2021-02-20
MW739455	21	7	4	USA	Northern America	2021-01-26
MW749457	21	7	4	USA	Northern America	2021-02-24
MW750034	21	7	4	USA	Northern America	2021-02-10
MW758617	21	7	4	USA	Northern America	2021-02-26
MW763956	21	7	4	USA	Northern America	2021-03-01
MW764007	21	7	4	USA	Northern America	2021-03-02
MW485367	21	7	3	USA	Northern America	2020-12-28
MW565122	21	7	3	USA	Northern America	2020-11-18
MW631907	21	7	3	USA	Northern America	2021-02-06
MW708681	21	7	3	USA	Northern America	2021-01-02
MW783146	21	7	3	USA	Northern America	2021-03-01
MW693921	22	7	8	USA	Northern America	2021-02-11
MT745606	22	7	7	Australia	Australia and New Zealand	2020-04-16
MW681434	22	7	7	USA	Northern America	2021-02-09
MW521538	22	7	6	USA	Northern America	2020-11-09
MW669232	22	7	6	USA	Northern America	2021-02-08
MW719544	22	7	6	USA	Northern America	2021-01-04
MW685594	22	7	5	USA	Northern America	2021-01-25
MW763479	22	7	5	USA	Northern America	2021-03-01
MW490809	22	7	4	USA	Northern America	2020-07-07
MW583174	22	7	4	USA	Northern America	2021-01-16
MW626643	22	7	4	USA	Northern America	2021-01-12
MW694241	22	7	4	USA	Northern America	2021-02-12
MW763780	22	7	4	USA	Northern America	2021-03-01
MW772104	22	7	3	USA	Northern America	2021-02-28
MW673267	22	7	2	USA	Northern America	2021-01-30
MW696468	23	7	6	USA	Northern America	2021-02-14
MW650131	23	7	5	USA	Northern America	2021-01-28
MW666679	23	7	5	USA	Northern America	2021-01-30
MW693507	23	7	5	USA	Northern America	2021-02-10
MW698089	23	7	5	USA	Northern America	2021-02-15
MW706619	23	7	5	USA	Northern America	2021-02-09
MW424842	23	7	4	USA	Northern America	2020-06-20
MW540273	23	7	4	USA	Northern America	2020-12-29
MW673037	23	7	4	USA	Northern America	2021-02-07
MW728149	23	7	4	USA	Northern America	2021-02-23
MW768002	23	7	4	USA	Northern America	2021-02-24
MW778997	23	7	4	USA	Northern America	2021-02-19
MW763307	24	7	7	USA	Northern America	2021-03-01
MW493985	24	7	5	USA	Northern America	2020-11-26
MW725865	24	7	5	USA	Northern America	2021-02-24
MW748124	24	7	5	USA	Northern America	2021-02-08
MW777947	24	7	5	USA	Northern America	2021-02-20
MW648085	24	7	4	USA	Northern America	2021-01-26
MW672742	24	7	4	USA	Northern America	2021-02-03
MW672987	24	7	4	USA	Northern America	2021-02-07
MW693389	24	7	4	USA	Northern America	2021-02-11
MW693653	24	7	4	USA	Northern America	2021-02-09
MW693854	24	7	4	USA	Northern America	2021-02-11
MW694227	24	7	4	USA	Northern America	2021-02-12
MW720547	24	7	4	USA	Northern America	2021-02-18
MW741600	24	7	4	USA	Northern America	2021-02-14
MW763174	24	7	4	USA	Northern America	2020-06-24
MW505198	24	7	3	USA	Northern America	2021-01-08
MW668819	24	7	3	USA	Northern America	2021-02-04
MW778427	24	7	3	USA	Northern America	2021-02-21
MW582274	25	7	5	USA	Northern America	2020-12-27
MW591242	25	7	5	USA	Northern America	2021-01-20
MW631762	25	7	5	USA	Northern America	2021-02-05
MW693229	25	7	5	USA	Northern America	2021-02-09
MW777084	25	7	5	USA	Northern America	2021-02-14
MW777744	25	7	5	USA	Northern America	2021-02-17
MW779212	25	7	5	USA	Northern America	2021-02-23
MW490737	25	7	4	USA	Northern America	2020-11-04
MW589619	25	7	4	USA	Northern America	2020-12-11
MW693274	25	7	4	USA	Northern America	2021-02-09
MW693656	25	7	4	USA	Northern America	2021-02-09
MW715466	25	7	4	USA	Northern America	2021-02-08
MW535184	26	7	5	USA	Northern America	2020-10-01
MW726064	26	7	5	USA	Northern America	2021-02-25
MW693249	26	7	4	USA	Northern America	2021-02-09
MW693525	26	7	3	USA	Northern America	2021-02-11
MW739748	26	7	3	USA	Northern America	2021-01-25
MW505087	27	7	6	USA	Northern America	2020-12-15
MW540342	27	7	5	USA	Northern America	2021-01-12
MW694252	27	7	5	USA	Northern America	2021-02-12
MW648062	28	7	5	USA	Northern America	2021-01-25
MW673282	28	7	3	USA	Northern America	2021-01-29
MW693608	29	7	3	USA	Northern America	2021-02-09
MW555931	29	7	2	USA	Northern America	2021-01-11
MW648031	29	7	2	USA	Northern America	2021-01-21
MT811653	30	7	5	USA	Northern America	2020-03-31
MW673234	30	7	5	USA	Northern America	2021-01-29
MW693415	30	7	5	USA	Northern America	2021-02-08
MW738300	30	7	4	USA	Northern America	2021-01-06
MT658509	31	7	5	Egypt	Northern Africa	2020-06-02
MW223129	31	7	4	USA	Northern America	2020-07-02
MW673239	31	7	4	USA	Northern America	2021-01-29
MW693529	31	7	4	USA	Northern America	2021-02-09
MW476652	32	7	7	USA	Northern America	2020-12-10
MW693328	32	7	7	USA	Northern America	2021-02-10
MW751207	32	7	6	Kenya	Eastern Africa	2020-04-18
MW190096	32	7	4	USA	Northern America	2020-06-06
MW672878	32	7	3	USA	Northern America	2021-02-06
MW681072	32	7	3	USA	Northern America	2021-01-05
MW693506	33	7	4	USA	Northern America	2021-02-09
MW693851	33	7	4	USA	Northern America	2021-02-11
MT886418	34	7	4	USA	Northern America	2020-04-10
MW689844	35	7	3	USA	Northern America	2021-02-05
MW721412	37	7	6	USA	Northern America	2021-02-10
MW545195	38	7	7	USA	Northern America	2021-01-10
MW323010	38	7	5	USA	Northern America	2020-05-01
MW403633	40	7	7	USA	Northern America	2020-11-19
MW721380	40	7	5	USA	Northern America	2021-02-09
MW406700	43	7	5	USA	Northern America	2020-06-24
MW700710	43	7	4	USA	Northern America	2020-12-21
MW648098	43	7	3	USA	Northern America	2021-01-23
MW586569	45	7	6	USA	Northern America	2021-01-20
MW309076	45	7	5	USA	Northern America	2020-05-01
MW687191	45	7	4	USA	Northern America	2021-01-20
MW474308	46	7	5	USA	Northern America	2020-11-17
MW565361	46	7	4	USA	Northern America	2020-11-14
MW596204	46	7	4	USA	Northern America	2021-01-09
MW223128	47	7	5	USA	Northern America	2020-07-02
MW724756	47	7	5	USA	Northern America	2020-06-13
MW474253	47	7	3	USA	Northern America	2020-11-09
MW331643	48	7	5	USA	Northern America	2020-06-22
MW331619	48	7	4	USA	Northern America	2020-06-22
MW403746	48	7	4	USA	Northern America	2020-06-15
MW474245	48	7	4	USA	Northern America	2020-11-09
MW093549	49	7	5	USA	Northern America	2020-09-10
MW148545	49	7	5	USA	Northern America	2020-05-12
MW689179	49	7	5	USA	Northern America	2021-02-16
MW714008	49	7	5	USA	Northern America	2020-06-25
MW223091	49	7	4	USA	Northern America	2020-06-16
MW190153	50	7	5	USA	Northern America	2020-06-20
MW223112	50	7	5	USA	Northern America	2020-06-16
MW365457	50	7	5	Chile	South America	2020-05-14
MW403743	50	7	5	USA	Northern America	2020-06-15
MT833960	50	7	4	USA	Northern America	2020-05-26
MW246012	52	7	5	USA	Northern America	2020-06-16
MW555920	52	7	5	USA	Northern America	2021-01-11
MW687239	52	7	4	USA	Northern America	2021-02-10
MW331613	53	7	5	USA	Northern America	2020-06-22
MW053748	53	7	4	USA	Northern America	2020-03-20
MW127858	54	7	5	USA	Northern America	2020-06-16
MW269915	54	7	4	USA	Northern America	2020-05-30
MT439266	55	7	6	USA	Northern America	2020-03-23
MT635210	55	7	6	USA	Northern America	2020-03-19
MT635230	55	7	6	USA	Northern America	2020-03-16
MT886443	55	7	6	USA	Northern America	2020-03-25
MT509680	55	7	5	USA	Northern America	2020-03-19
MW190152	55	7	5	USA	Northern America	2020-06-20
MW540364	55	7	5	USA	Northern America	2021-01-11
MT334555	55	7	4	USA	Northern America	2020-03-20
MT412186	55	7	4	USA	Northern America	2020-03-22
MW523853	55	7	4	USA	Northern America	2021-01-05
MT635213	56	7	4	USA	Northern America	2020-03-19
MW093503	56	7	4	USA	Northern America	2020-03-16
MT635219	57	7	6	USA	Northern America	2020-03-18
MT506636	57	7	5	USA	Northern America	2020-03-13
MW349156	57	7	5	USA	Northern America	2020-06-22
MT412160	57	7	4	USA	Northern America	2020-03-18
MW539735	58	7	5	USA	Northern America	2020-04-27
MW592607	58	7	5	USA	Northern America	2021-01-30
MW738896	58	7	4	USA	Northern America	2020-06-15
MT635247	59	7	6	USA	Northern America	2020-03-27
MW133678	59	7	5	USA	Northern America	2020-06-16
MW217410	59	7	5	USA	Northern America	2020-06-15
MW565544	59	7	5	USA	Northern America	2020-05-26
MW738903	59	7	5	USA	Northern America	2020-06-19
MT635223	59	7	4	USA	Northern America	2020-03-18
MW332730	59	7	4	USA	Northern America	2020-09-25
MW341841	59	7	4	USA	Northern America	2020-09-24
MW436743	60	7	5	USA	Northern America	2020-11-23
MT641709	60	7	4	Australia	Australia and New Zealand	2020-04-04
MT929102	60	7	4	USA	Northern America	2020-08-05
MT439286	61	7	5	USA	Northern America	2020-03-24
MW134523	61	7	5	USA	Northern America	2020-07-19
MT412164	61	7	4	USA	Northern America	2020-03-19
MT846688	61	7	4	USA	Northern America	2020-07-16
MW035490	61	7	4	USA	Northern America	2020-08-26
MW342007	61	7	4	USA	Northern America	2020-10-15
MW535231	62	7	5	USA	Northern America	2020-12-29
MT641706	62	7	4	Australia	Australia and New Zealand	2020-03-30
MT929141	62	7	4	USA	Northern America	2020-08-09
MT981479	62	7	4	USA	Northern America	2020-08-08
MW369396	62	7	4	USA	Northern America	2020-10-22
MW751053	62	7	4	USA	Northern America	2021-01-19
MW228191	63	7	5	USA	Northern America	2020-06-15
MW252140	63	7	5	USA	Northern America	2020-06-17
MW666696	63	7	5	USA	Northern America	2021-02-01
MW735904	63	7	5	USA	Northern America	2020-06-18
MW763950	63	7	5	USA	Northern America	2021-02-28
MW521636	63	7	4	USA	Northern America	2020-12-03
MW181736	64	7	4	Hong Kong	Eastern Asia	2020-09-28
MW685608	65	7	5	USA	Northern America	2021-01-23
MW728573	65	7	5	USA	Northern America	2021-02-21
MW728587	65	7	5	USA	Northern America	2021-02-20
MW750858	65	7	5	USA	Northern America	2021-01-14
MW031020	65	7	4	USA	Northern America	2020-09-13
MW521608	65	7	4	USA	Northern America	2020-11-23
MW738939	65	7	4	USA	Northern America	2021-02-02
MW223092	66	7	5	USA	Northern America	2020-06-16
MW719895	66	7	5	USA	Northern America	2021-02-20
MW617834	66	7	4	USA	Northern America	2021-01-20
MW698173	67	7	5	USA	Northern America	2021-02-12
MW728690	67	7	5	USA	Northern America	2021-02-20
MW521618	67	7	4	USA	Northern America	2020-11-30
MW617830	67	7	4	USA	Northern America	2021-01-19
MW617832	67	7	4	USA	Northern America	2021-01-21
MW685584	68	7	5	USA	Northern America	2021-01-11
MW181739	68	7	4	Hong Kong	Eastern Asia	2020-10-05
MW521642	68	7	4	USA	Northern America	2020-12-07
MW341845	69	7	5	USA	Northern America	2020-09-29
MW698779	69	7	5	USA	Northern America	2020-11-09
MW751060	69	7	4	USA	Northern America	2021-01-19
MW617694	70	7	5	USA	Northern America	2021-01-28
MW720384	70	7	5	USA	Northern America	2021-02-19
MW181732	70	7	4	Hong Kong	Eastern Asia	2020-09-19
MW698778	73	7	5	USA	Northern America	2020-11-09
MW056081	73	7	4	USA	Northern America	2020-04-21
MT451307	94	7	6	Australia	Australia and New Zealand	2020-03-25
MT451262	105	7	6	Australia	Australia and New Zealand	2020-03-22
MT451377	107	7	6	Australia	Australia and New Zealand	2020-03-23
MT451379	108	7	6	Australia	Australia and New Zealand	2020-03-25
MT451369	109	7	6	Australia	Australia and New Zealand	2020-03-24
MT451350	113	7	5	Australia	Australia and New Zealand	2020-03-23
MT451406	128	7	5	Australia	Australia and New Zealand	2020-03-22
MT632790	6	6	5	USA	Northern America	2020-04-02
MT800794	6	6	3	India	Southern Asia	2020-06-15
MT457394	7	6	5	Netherlands	Western Europe	2020-04-29
MT457395	7	6	5	Netherlands	Western Europe	2020-04-29
MT806192	7	6	4	India	Southern Asia	2020-06-15
MT831811	7	6	4	USA	Northern America	2020-06-20
MW155141	7	6	4	Australia	Australia and New Zealand	2020-09-05
MW156789	7	6	4	Australia	Australia and New Zealand	2020-08-24
MW156996	7	6	4	Australia	Australia and New Zealand	2020-08-27
MW349099	7	6	4	USA	Northern America	2020-03-28
MW642647	7	6	4	USA	Northern America	2021-01-28
MW184850	7	6	2	Australia	Australia and New Zealand	2020-08-02
MT831333	8	6	6	USA	Northern America	2020-06-08
MT831371	8	6	6	USA	Northern America	2020-06-08
MT831748	8	6	6	USA	Northern America	2020-06-16
MT834236	8	6	6	USA	Northern America	2020-05-29
MT457398	8	6	5	Netherlands	Western Europe	2020-04-25
MT457399	8	6	5	Netherlands	Western Europe	2020-04-28
MW155082	8	6	4	Australia	Australia and New Zealand	2020-09-01
MW156848	8	6	4	Australia	Australia and New Zealand	2020-08-24
MW773905	8	6	4	USA	Northern America	2020-07-21
MT929133	8	6	3	USA	Northern America	2020-08-11
MT969963	8	6	3	Australia	Australia and New Zealand	2020-07-08
MT970179	8	6	3	Australia	Australia and New Zealand	2020-07-05
MT970188	8	6	3	Australia	Australia and New Zealand	2020-07-05
MT971706	8	6	3	Australia	Australia and New Zealand	2020-07-19
MT972442	8	6	3	Australia	Australia and New Zealand	2020-07-05
MT972779	8	6	3	Australia	Australia and New Zealand	2020-07-11
MW156071	8	6	3	Australia	Australia and New Zealand	2020-08-13
MW493671	8	6	3	USA	Northern America	2020-06-16
MW521743	8	6	3	USA	Northern America	2020-08-24
MW549648	8	6	3	USA	Northern America	2021-01-09
MT971228	8	6	2	Australia	Australia and New Zealand	2020-07-18
MT973261	8	6	2	Australia	Australia and New Zealand	2020-07-23
MW639988	9	6	4	USA	Northern America	2021-01-19
MW706768	9	6	4	USA	Northern America	2021-02-15
MT873140	9	6	3	USA	Northern America	2020-05-07
MT969773	9	6	3	Australia	Australia and New Zealand	2020-07-07
MT969801	9	6	3	Australia	Australia and New Zealand	2020-07-07
MT969803	9	6	3	Australia	Australia and New Zealand	2020-07-07
MT970253	9	6	3	Australia	Australia and New Zealand	2020-07-13
MT970267	9	6	3	Australia	Australia and New Zealand	2020-07-13
MT970280	9	6	3	Australia	Australia and New Zealand	2020-06-30
MT970562	9	6	3	Australia	Australia and New Zealand	2020-07-16
MT970643	9	6	3	Australia	Australia and New Zealand	2020-07-14
MT970738	9	6	3	Australia	Australia and New Zealand	2020-07-18
MT970753	9	6	3	Australia	Australia and New Zealand	2020-07-16
MT970767	9	6	3	Australia	Australia and New Zealand	2020-07-15
MT970835	9	6	3	Australia	Australia and New Zealand	2020-07-16
MT970996	9	6	3	Australia	Australia and New Zealand	2020-07-17
MT971005	9	6	3	Australia	Australia and New Zealand	2020-07-15
MT971008	9	6	3	Australia	Australia and New Zealand	2020
MT971012	9	6	3	Australia	Australia and New Zealand	2020-07-18
MT971083	9	6	3	Australia	Australia and New Zealand	2020-07-18
MT971136	9	6	3	Australia	Australia and New Zealand	2020-07-19
MT971156	9	6	3	Australia	Australia and New Zealand	2020-07-18
MT971192	9	6	3	Australia	Australia and New Zealand	2020-07-19
MT971213	9	6	3	Australia	Australia and New Zealand	2020-07-17
MT971329	9	6	3	Australia	Australia and New Zealand	2020-07-18
MT971391	9	6	3	Australia	Australia and New Zealand	2020-07-06
MT971395	9	6	3	Australia	Australia and New Zealand	2020-07-09
MT971458	9	6	3	Australia	Australia and New Zealand	2020-07-19
MT971463	9	6	3	Australia	Australia and New Zealand	2020-07-19
MT971466	9	6	3	Australia	Australia and New Zealand	2020-07-18
MT971474	9	6	3	Australia	Australia and New Zealand	2020-07-18
MT971495	9	6	3	Australia	Australia and New Zealand	2020-07-20
MT971525	9	6	3	Australia	Australia and New Zealand	2020-07-21
MT971539	9	6	3	Australia	Australia and New Zealand	2020-07-21
MT971749	9	6	3	Australia	Australia and New Zealand	2020
MT971750	9	6	3	Australia	Australia and New Zealand	2020-07-20
MT971752	9	6	3	Australia	Australia and New Zealand	2020-07-20
MT971806	9	6	3	Australia	Australia and New Zealand	2020-07-20
MT971822	9	6	3	Australia	Australia and New Zealand	2020-07-20
MT971914	9	6	3	Australia	Australia and New Zealand	2020-07-22
MT971949	9	6	3	Australia	Australia and New Zealand	2020-07-23
MT971958	9	6	3	Australia	Australia and New Zealand	2020-07-27
MT971969	9	6	3	Australia	Australia and New Zealand	2020-07-22
MT972049	9	6	3	Australia	Australia and New Zealand	2020-07-22
MT972517	9	6	3	Australia	Australia and New Zealand	2020-07-05
MT972525	9	6	3	Australia	Australia and New Zealand	2020-07-05
MT972705	9	6	3	Australia	Australia and New Zealand	2020
MT972894	9	6	3	Australia	Australia and New Zealand	2020-07-14
MT972944	9	6	3	Australia	Australia and New Zealand	2020-07-15
MT972946	9	6	3	Australia	Australia and New Zealand	2020-07-15
MT973106	9	6	3	Australia	Australia and New Zealand	2020-07-20
MT973144	9	6	3	Australia	Australia and New Zealand	2020-07-20
MT973145	9	6	3	Australia	Australia and New Zealand	2020-07-20
MT973211	9	6	3	Australia	Australia and New Zealand	2020-07-22
MT973271	9	6	3	Australia	Australia and New Zealand	2020-07-14
MW153376	9	6	3	Australia	Australia and New Zealand	2020-08-17
MW153678	9	6	3	Australia	Australia and New Zealand	2020-08-12
MW153843	9	6	3	Australia	Australia and New Zealand	2020-08-04
MW153993	9	6	3	Australia	Australia and New Zealand	2020-07-21
MW154056	9	6	3	Australia	Australia and New Zealand	2020-07-23
MW154105	9	6	3	Australia	Australia and New Zealand	2020-07-24
MW154109	9	6	3	Australia	Australia and New Zealand	2020-07-22
MW154116	9	6	3	Australia	Australia and New Zealand	2020-07-26
MW154468	9	6	3	Australia	Australia and New Zealand	2020-07-22
MW154469	9	6	3	Australia	Australia and New Zealand	2020-07-22
MW154610	9	6	3	Australia	Australia and New Zealand	2020-08-01
MW154624	9	6	3	Australia	Australia and New Zealand	2020-07-31
MW154658	9	6	3	Australia	Australia and New Zealand	2020-07-30
MW154669	9	6	3	Australia	Australia and New Zealand	2020-07-29
MW154685	9	6	3	Australia	Australia and New Zealand	2020-07-29
MW154705	9	6	3	Australia	Australia and New Zealand	2020-07-28
MW154800	9	6	3	Australia	Australia and New Zealand	2020-07-25
MW154806	9	6	3	Australia	Australia and New Zealand	2020-07-26
MW154952	9	6	3	Australia	Australia and New Zealand	2020-07-24
MW155009	9	6	3	Australia	Australia and New Zealand	2020-07-06
MW155533	9	6	3	Australia	Australia and New Zealand	2020-07-22
MW155580	9	6	3	Australia	Australia and New Zealand	2020-07-23
MW155606	9	6	3	Australia	Australia and New Zealand	2020-07-23
MW155620	9	6	3	Australia	Australia and New Zealand	2020-07-27
MW155627	9	6	3	Australia	Australia and New Zealand	2020-07-27
MW155646	9	6	3	Australia	Australia and New Zealand	2020-07-27
MW155655	9	6	3	Australia	Australia and New Zealand	2020-07-27
MW155718	9	6	3	Australia	Australia and New Zealand	2020-07-29
MW156292	9	6	3	Australia	Australia and New Zealand	2020-07-27
MW156293	9	6	3	Australia	Australia and New Zealand	2020-07-17
MW156347	9	6	3	Australia	Australia and New Zealand	2020-07-22
MW156446	9	6	3	Australia	Australia and New Zealand	2020-07-22
MW156500	9	6	3	Australia	Australia and New Zealand	2020-07-26
MW156521	9	6	3	Australia	Australia and New Zealand	2020-07-18
MW156541	9	6	3	Australia	Australia and New Zealand	2020-07-14
MW184092	9	6	3	Australia	Australia and New Zealand	2020-08-10
MW184219	9	6	3	Australia	Australia and New Zealand	2020-08-03
MW184359	9	6	3	Australia	Australia and New Zealand	2020-07-26
MW184366	9	6	3	Australia	Australia and New Zealand	2020-07-27
MW184590	9	6	3	Australia	Australia and New Zealand	2020-08-02
MW184716	9	6	3	Australia	Australia and New Zealand	2020-08-03
MW184750	9	6	3	Australia	Australia and New Zealand	2020-07-30
MW184763	9	6	3	Australia	Australia and New Zealand	2020-08-03
MW184794	9	6	3	Australia	Australia and New Zealand	2020-08-06
MW184945	9	6	3	Australia	Australia and New Zealand	2020-07-29
MW184949	9	6	3	Australia	Australia and New Zealand	2020-07-26
MW184952	9	6	3	Australia	Australia and New Zealand	2020-08-01
MW185144	9	6	3	Australia	Australia and New Zealand	2020-08-12
MW185223	9	6	3	Australia	Australia and New Zealand	2020-07-29
MW185335	9	6	3	Australia	Australia and New Zealand	2020-07-28
MW185346	9	6	3	Australia	Australia and New Zealand	2020-08-01
MW185372	9	6	3	Australia	Australia and New Zealand	2020-08-05
MW185739	9	6	3	Australia	Australia and New Zealand	2020-08-01
MW276693	9	6	3	Australia	Australia and New Zealand	2020-08-11
MW276720	9	6	3	Australia	Australia and New Zealand	2020-07-18
MW276751	9	6	3	Australia	Australia and New Zealand	2020-08-12
MW276786	9	6	3	Australia	Australia and New Zealand	2020-08-01
MW276875	9	6	3	Australia	Australia and New Zealand	2020-08-03
MW276927	9	6	3	Australia	Australia and New Zealand	2020-07-29
MW276962	9	6	3	Australia	Australia and New Zealand	2020-08-05
MW276967	9	6	3	Australia	Australia and New Zealand	2020
MW277008	9	6	3	Australia	Australia and New Zealand	2020-08-04
MW277022	9	6	3	Australia	Australia and New Zealand	2020-08-02
MW277166	9	6	3	Australia	Australia and New Zealand	2020-07-25
MW277170	9	6	3	Australia	Australia and New Zealand	2020-07-29
MW277184	9	6	3	Australia	Australia and New Zealand	2020-07-29
MW277202	9	6	3	Australia	Australia and New Zealand	2020-07-25
MW277220	9	6	3	Australia	Australia and New Zealand	2020-08-06
MW277230	9	6	3	Australia	Australia and New Zealand	2020-07-29
MW277256	9	6	3	Australia	Australia and New Zealand	2020-07-29
MW277327	9	6	3	Australia	Australia and New Zealand	2020
MW277448	9	6	3	Australia	Australia and New Zealand	2020-08-01
MW277496	9	6	3	Australia	Australia and New Zealand	2020-08-04
MW320824	9	6	3	Australia	Australia and New Zealand	2020-07-28
MW320893	9	6	3	Australia	Australia and New Zealand	2020-08-06
MW320949	9	6	3	Australia	Australia and New Zealand	2020-08-14
MW321058	9	6	3	Australia	Australia and New Zealand	2020-08-05
MW736756	9	6	3	USA	Northern America	2021-01-07
MW736757	9	6	3	USA	Northern America	2021-01-07
MW779352	9	6	3	USA	Northern America	2021-02-22
MW155465	9	6	2	Australia	Australia and New Zealand	2020-08-13
MT419829	10	6	5	USA	Northern America	2020-02-28
MW155605	10	6	5	Australia	Australia and New Zealand	2020-07-23
MW599493	10	6	5	USA	Northern America	2021-01-15
MW669454	10	6	5	USA	Northern America	2021-02-04
MW708030	10	6	5	USA	Northern America	2021-02-15
MW771785	10	6	5	USA	Northern America	2021-02-27
MW771791	10	6	5	USA	Northern America	2021-02-27
MW771795	10	6	5	USA	Northern America	2021-02-26
MT958262	10	6	4	USA	Northern America	2020-08-14
MW206418	10	6	4	USA	Northern America	2020-10-01
MW422048	10	6	4	Pakistan	Southern Asia	2020-05-30
MW422049	10	6	4	Pakistan	Southern Asia	2020-05-30
MW696925	10	6	4	USA	Northern America	2021-02-19
MW739565	10	6	4	USA	Northern America	2021-01-17
MW767293	10	6	4	USA	Northern America	2021-02-13
MW773995	10	6	4	USA	Northern America	2021-02-25
MT773133	10	6	3	India	Southern Asia	2020-06-13
MT970375	10	6	3	Australia	Australia and New Zealand	2020-07-14
MT970765	10	6	3	Australia	Australia and New Zealand	2020-07-16
MT971025	10	6	3	Australia	Australia and New Zealand	2020-07-19
MT971092	10	6	3	Australia	Australia and New Zealand	2020-07-18
MT971284	10	6	3	Australia	Australia and New Zealand	2020-07-17
MT971313	10	6	3	Australia	Australia and New Zealand	2020-07-17
MT971521	10	6	3	Australia	Australia and New Zealand	2020-07-21
MT971782	10	6	3	Australia	Australia and New Zealand	2020-07-24
MT972591	10	6	3	Australia	Australia and New Zealand	2020-07-05
MT972933	10	6	3	Australia	Australia and New Zealand	2020-07-15
MW075727	10	6	3	USA	Northern America	2020-06-07
MW153591	10	6	3	Australia	Australia and New Zealand	2020-08-10
MW154495	10	6	3	Australia	Australia and New Zealand	2020-08-07
MW154656	10	6	3	Australia	Australia and New Zealand	2020-07-30
MW155535	10	6	3	Australia	Australia and New Zealand	2020-07-22
MW155632	10	6	3	Australia	Australia and New Zealand	2020-07-27
MW155633	10	6	3	Australia	Australia and New Zealand	2020-07-27
MW155792	10	6	3	Australia	Australia and New Zealand	2020-07-31
MW156344	10	6	3	Australia	Australia and New Zealand	2020-07-25
MW184076	10	6	3	Australia	Australia and New Zealand	2020-08-03
MW184634	10	6	3	Australia	Australia and New Zealand	2020-08-18
MW184683	10	6	3	Australia	Australia and New Zealand	2020-08-11
MW184729	10	6	3	Australia	Australia and New Zealand	2020-08-19
MW276696	10	6	3	Australia	Australia and New Zealand	2020-08-08
MW276742	10	6	3	Australia	Australia and New Zealand	2020-07-29
MW277019	10	6	3	Australia	Australia and New Zealand	2020-08-02
MW277325	10	6	3	Australia	Australia and New Zealand	2020-07-25
MW277460	10	6	3	Australia	Australia and New Zealand	2020-08-09
MW277542	10	6	3	Australia	Australia and New Zealand	2020-07-18
MW321044	10	6	3	Australia	Australia and New Zealand	2020-07-15
MW636446	10	6	3	USA	Northern America	2021-01-18
MW668960	10	6	3	USA	Northern America	2021-02-03
MW698111	10	6	3	USA	Northern America	2021-02-15
MW755804	10	6	3	USA	Northern America	2021-02-08
MW778697	10	6	3	USA	Northern America	2021-02-21
MW155174	11	6	5	Australia	Australia and New Zealand	2020-09-08
MW155237	11	6	5	Australia	Australia and New Zealand	2020-09-09
MW155967	11	6	5	Australia	Australia and New Zealand	2020-08-13
MW157209	11	6	5	Australia	Australia and New Zealand	2020-09-05
MW547412	11	6	5	Egypt	Northern Africa	2020-11-19
MW547419	11	6	5	Egypt	Northern Africa	2020-11-19
MW547420	11	6	5	Egypt	Northern Africa	2020-11-19
MT958263	11	6	4	USA	Northern America	2020-08-11
MW156838	11	6	4	Australia	Australia and New Zealand	2020-08-21
MW156994	11	6	4	Australia	Australia and New Zealand	2020-08-27
MW183992	11	6	4	Australia	Australia and New Zealand	2020-09-19
MW642615	11	6	4	USA	Northern America	2021-02-02
MT970831	11	6	3	Australia	Australia and New Zealand	2020
MT971785	11	6	3	Australia	Australia and New Zealand	2020-07-24
MW154776	11	6	3	Australia	Australia and New Zealand	2020-07-27
MW154777	11	6	3	Australia	Australia and New Zealand	2020-07-27
MW154979	11	6	3	Australia	Australia and New Zealand	2020-07-23
MW155856	11	6	3	Australia	Australia and New Zealand	2020-07-29
MW156180	11	6	3	Australia	Australia and New Zealand	2020-08-21
MW156277	11	6	3	Australia	Australia and New Zealand	2020-08-23
MW172749	11	6	3	USA	Northern America	2020-06-22
MW184304	11	6	3	Australia	Australia and New Zealand	2020-08-06
MW184389	11	6	3	Australia	Australia and New Zealand	2020-07-26
MW320835	11	6	3	Australia	Australia and New Zealand	2020-08-06
MW577775	11	6	3	USA	Northern America	2020-05-24
MW617466	11	6	3	USA	Northern America	2021-02-02
MW634762	11	6	3	USA	Northern America	2020-12-24
MW638164	11	6	3	USA	Northern America	2021-01-09
MW639931	11	6	3	USA	Northern America	2021-01-18
MW644159	11	6	3	USA	Northern America	2021-01-29
MW669420	11	6	3	USA	Northern America	2021-02-07
MW696954	11	6	3	USA	Northern America	2021-02-16
MW702085	11	6	3	USA	Northern America	2020-12-27
MW702377	11	6	3	USA	Northern America	2021-01-06
MW702398	11	6	3	USA	Northern America	2021-01-04
MW702413	11	6	3	USA	Northern America	2021-01-04
MW702433	11	6	3	USA	Northern America	2021-01-03
MW702877	11	6	3	USA	Northern America	2020-12-15
MW731071	11	6	3	USA	Northern America	2021-02-12
MW733315	11	6	3	USA	Northern America	2021-02-21
MW755801	11	6	3	USA	Northern America	2021-02-08
MW759592	11	6	3	USA	Northern America	2021-02-18
MW766583	11	6	3	USA	Northern America	2021-02-18
MW767197	11	6	3	USA	Northern America	2021-02-14
MW780602	11	6	3	USA	Northern America	2021-03-01
MW185577	11	6	2	Australia	Australia and New Zealand	2020-08-10
MW206523	11	6	2	USA	Northern America	2020-04-09
MW591248	11	6	2	USA	Northern America	2021-01-21
MW035377	11	6	1	USA	Northern America	2020-08-10
MW155425	12	6	5	Australia	Australia and New Zealand	2020-09-17
MW185292	12	6	5	Australia	Australia and New Zealand	2020-09-20
MW735878	12	6	5	USA	Northern America	2020-06-12
MW749399	12	6	5	USA	Northern America	2021-02-25
MW155411	12	6	4	Australia	Australia and New Zealand	2020-09-17
MW545438	12	6	4	USA	Northern America	2021-01-11
MW545482	12	6	4	USA	Northern America	2021-01-07
MW565087	12	6	4	USA	Northern America	2020-11-18
MW586809	12	6	4	USA	Northern America	2021-01-15
MW634925	12	6	4	USA	Northern America	2020-12-27
MW636975	12	6	4	USA	Northern America	2021-01-16
MW640077	12	6	4	USA	Northern America	2021-01-20
MW693518	12	6	4	USA	Northern America	2021-02-10
MW702216	12	6	4	USA	Northern America	2020-12-14
MW702220	12	6	4	USA	Northern America	2020-12-15
MW702225	12	6	4	USA	Northern America	2020-12-15
MW702807	12	6	4	USA	Northern America	2021-01-12
MW715201	12	6	4	USA	Northern America	2021-02-16
MW731278	12	6	4	USA	Northern America	2021-02-01
MW771958	12	6	4	USA	Northern America	2021-03-01
MW778170	12	6	4	USA	Northern America	2021-02-19
MT528627	12	6	3	USA	Northern America	2020-04
MT973192	12	6	3	Australia	Australia and New Zealand	2020-07-22
MW023507	12	6	3	USA	Northern America	2020-06-23
MW153685	12	6	3	Australia	Australia and New Zealand	2020-08-13
MW154778	12	6	3	Australia	Australia and New Zealand	2020-07-27
MW155485	12	6	3	Australia	Australia and New Zealand	2020-08-15
MW155833	12	6	3	Australia	Australia and New Zealand	2020-07-30
MW277530	12	6	3	Australia	Australia and New Zealand	2020-08-08
MW321202	12	6	3	Australia	Australia and New Zealand	2020-07-20
MW420173	12	6	3	USA	Northern America	2020-08-09
MW491036	12	6	3	USA	Northern America	2020-11-04
MW523873	12	6	3	USA	Northern America	2021-01-05
MW550086	12	6	3	USA	Northern America	2021-01-08
MW577100	12	6	3	USA	Northern America	2021-01-08
MW585867	12	6	3	USA	Northern America	2021-01-19
MW586450	12	6	3	USA	Northern America	2021-01-21
MW586719	12	6	3	USA	Northern America	2021-01-13
MW636465	12	6	3	USA	Northern America	2021-01-18
MW640555	12	6	3	USA	Northern America	2021-01-24
MW671707	12	6	3	USA	Northern America	2021-02-01
MW671719	12	6	3	USA	Northern America	2021-02-01
MW671741	12	6	3	USA	Northern America	2021-02-01
MW672882	12	6	3	USA	Northern America	2021-02-06
MW701161	12	6	3	USA	Northern America	2021-01-04
MW702126	12	6	3	USA	Northern America	2020-12-19
MW702373	12	6	3	USA	Northern America	2021-01-06
MW702399	12	6	3	USA	Northern America	2021-01-04
MW702432	12	6	3	USA	Northern America	2021-01-03
MW705456	12	6	3	USA	Northern America	2021-02-09
MW707959	12	6	3	USA	Northern America	2021-02-16
MW731283	12	6	3	USA	Northern America	2021-01-29
MW731383	12	6	3	USA	Northern America	2021-02-06
MW766915	12	6	3	USA	Northern America	2021-03-05
MW777740	12	6	3	USA	Northern America	2021-02-17
MW781368	12	6	3	USA	Northern America	2021-02-20
MW518820	12	6	2	USA	Northern America	2021-01-02
MW585897	12	6	2	USA	Northern America	2021-01-18
MW586395	12	6	2	USA	Northern America	2021-01-22
MW643627	12	6	2	USA	Northern America	2021-01-29
MW766626	12	6	2	USA	Northern America	2021-02-19
MW777092	12	6	2	USA	Northern America	2021-02-14
MW777549	12	6	2	USA	Northern America	2021-02-14
MW424885	13	6	7	USA	Northern America	2020-12-19
MW023526	13	6	5	USA	Northern America	2020-07-14
MW773259	13	6	5	USA	Northern America	2021-02-27
MW084598	13	6	4	USA	Northern America	2020-06-01
MW666687	13	6	4	USA	Northern America	2021-02-01
MW700606	13	6	4	USA	Northern America	2021-01-02
MW700644	13	6	4	USA	Northern America	2021-01-10
MW700645	13	6	4	USA	Northern America	2021-01-10
MW700648	13	6	4	USA	Northern America	2021-01-10
MW700660	13	6	4	USA	Northern America	2021-01-12
MW700678	13	6	4	USA	Northern America	2021-01-12
MW701100	13	6	4	USA	Northern America	2021-01-19
MW702212	13	6	4	USA	Northern America	2020-12-29
MW702226	13	6	4	USA	Northern America	2020-12-15
MW702244	13	6	4	USA	Northern America	2020-12-21
MW702524	13	6	4	USA	Northern America	2020-12-11
MW702794	13	6	4	USA	Northern America	2021-01-13
MW709090	13	6	4	USA	Northern America	2021-01-25
MW725786	13	6	4	USA	Northern America	2021-02-17
MW731082	13	6	4	USA	Northern America	2021-01-27
MW736694	13	6	4	USA	Northern America	2021-01-11
MW738360	13	6	4	USA	Northern America	2021-01-04
MW738468	13	6	4	USA	Northern America	2021-01-13
MW738473	13	6	4	USA	Northern America	2021-01-13
MW780427	13	6	4	USA	Northern America	2021-02-22
MW781459	13	6	4	USA	Northern America	2021-03-01
MT506657	13	6	3	USA	Northern America	2020-03-18
MW154170	13	6	3	Australia	Australia and New Zealand	2020-07-08
MW453103	13	6	3	USA	Northern America	2020-12-24
MW493986	13	6	3	USA	Northern America	2020-12-09
MW493988	13	6	3	USA	Northern America	2020-12-09
MW549668	13	6	3	USA	Northern America	2021-01-09
MW560904	13	6	3	USA	Northern America	2021-01-09
MW560915	13	6	3	USA	Northern America	2021-01-18
MW560916	13	6	3	USA	Northern America	2021-01-18
MW596039	13	6	3	USA	Northern America	2021-01-30
MW596142	13	6	3	USA	Northern America	2021-01-08
MW631888	13	6	3	USA	Northern America	2021-02-08
MW636405	13	6	3	USA	Northern America	2021-01-16
MW636919	13	6	3	USA	Northern America	2021-01-19
MW638372	13	6	3	USA	Northern America	2021-01-12
MW638458	13	6	3	USA	Northern America	2021-01-02
MW638930	13	6	3	USA	Northern America	2021-01-08
MW640178	13	6	3	USA	Northern America	2021-01-21
MW643589	13	6	3	USA	Northern America	2021-01-29
MW643738	13	6	3	USA	Northern America	2021-02-01
MW643785	13	6	3	USA	Northern America	2021-02-01
MW644100	13	6	3	USA	Northern America	2021-01-27
MW668519	13	6	3	USA	Northern America	2021-02-05
MW671697	13	6	3	USA	Northern America	2021-02-01
MW671699	13	6	3	USA	Northern America	2021-02-01
MW672768	13	6	3	USA	Northern America	2021-02-04
MW673278	13	6	3	USA	Northern America	2021-01-29
MW693800	13	6	3	USA	Northern America	2021-02-11
MW696438	13	6	3	USA	Northern America	2021-02-13
MW699248	13	6	3	USA	Northern America	2021-02-18
MW700508	13	6	3	USA	Northern America	2020-12-09
MW700665	13	6	3	USA	Northern America	2021-01-12
MW701208	13	6	3	USA	Northern America	2020-12-29
MW702392	13	6	3	USA	Northern America	2021-01-04
MW702400	13	6	3	USA	Northern America	2021-01-04
MW702403	13	6	3	USA	Northern America	2021-01-04
MW702404	13	6	3	USA	Northern America	2021-01-04
MW702411	13	6	3	USA	Northern America	2021-01-04
MW702429	13	6	3	USA	Northern America	2021-01-03
MW702430	13	6	3	USA	Northern America	2021-01-03
MW702431	13	6	3	USA	Northern America	2021-01-03
MW702838	13	6	3	USA	Northern America	2020-12-21
MW702839	13	6	3	USA	Northern America	2020-12-21
MW705648	13	6	3	USA	Northern America	2021-02-09
MW705683	13	6	3	USA	Northern America	2021-02-09
MW705935	13	6	3	USA	Northern America	2021-02-09
MW707737	13	6	3	USA	Northern America	2021-02-11
MW707940	13	6	3	USA	Northern America	2021-02-15
MW708734	13	6	3	USA	Northern America	2021-01-27
MW730970	13	6	3	USA	Northern America	2021-01-11
MW731028	13	6	3	USA	Northern America	2021-01-18
MW731252	13	6	3	USA	Northern America	2021-02-11
MW734305	13	6	3	USA	Northern America	2021-02-17
MW735009	13	6	3	USA	Northern America	2021-02-23
MW735311	13	6	3	USA	Northern America	2021-02-26
MW737947	13	6	3	USA	Northern America	2021-02-03
MW749426	13	6	3	USA	Northern America	2021-02-24
MW752939	13	6	3	USA	Northern America	2021-02-18
MW758813	13	6	3	USA	Northern America	2021-02-24
MW758840	13	6	3	USA	Northern America	2021-02-24
MW766697	13	6	3	USA	Northern America	2021-02-25
MW771991	13	6	3	USA	Northern America	2021-03-04
MW773427	13	6	3	USA	Northern America	2021-03-03
MW777001	13	6	3	USA	Northern America	2021-02-15
MW778407	13	6	3	USA	Northern America	2021-02-16
MW778991	13	6	3	USA	Northern America	2021-02-22
MW780576	13	6	3	USA	Northern America	2021-02-26
MW781566	13	6	3	USA	Northern America	2021-03-03
MW783370	13	6	3	USA	Northern America	2021-03-01
MW545442	13	6	2	USA	Northern America	2021-01-11
MW577879	13	6	2	USA	Northern America	2021-01-27
MW586182	13	6	2	USA	Northern America	2021-01-28
MW586438	13	6	2	USA	Northern America	2021-01-22
MW636921	13	6	2	USA	Northern America	2021-01-19
MW665584	13	6	2	USA	Northern America	2021-01-29
MW705580	13	6	2	USA	Northern America	2021-02-08
MW722087	13	6	2	USA	Northern America	2021-02-15
MW725590	13	6	2	USA	Northern America	2021-02-11
MW725651	13	6	2	USA	Northern America	2021-02-12
MW731206	13	6	2	USA	Northern America	2021-02-09
MW731261	13	6	2	USA	Northern America	2021-02-11
MW751521	13	6	2	USA	Northern America	2021-02-14
MW758854	13	6	2	USA	Northern America	2021-02-24
MW778731	13	6	2	USA	Northern America	2021-02-21
MW779114	13	6	2	USA	Northern America	2021-02-23
MW626347	14	6	6	USA	Northern America	2021-02-02
MW599635	14	6	5	USA	Northern America	2021-01-15
MW702789	14	6	5	USA	Northern America	2021-01-13
MW705566	14	6	5	USA	Northern America	2021-02-10
MW726063	14	6	5	USA	Northern America	2021-02-25
MW726067	14	6	5	USA	Northern America	2021-02-26
MW749954	14	6	5	USA	Northern America	2021-01-11
MW778259	14	6	5	USA	Northern America	2021-02-20
MW093598	14	6	4	USA	Northern America	2020-06-13
MW485907	14	6	4	USA	Northern America	2021-01-07
MW586754	14	6	4	USA	Northern America	2021-01-14
MW640132	14	6	4	USA	Northern America	2021-01-21
MW643893	14	6	4	USA	Northern America	2021-02-01
MW645501	14	6	4	USA	Northern America	2020-11-11
MW653519	14	6	4	USA	Northern America	2020-11-30
MW696411	14	6	4	USA	Northern America	2021-02-10
MW700611	14	6	4	USA	Northern America	2021-01-16
MW700646	14	6	4	USA	Northern America	2021-01-10
MW700647	14	6	4	USA	Northern America	2021-01-10
MW700662	14	6	4	USA	Northern America	2021-01-12
MW700680	14	6	4	USA	Northern America	2021-01-12
MW701102	14	6	4	USA	Northern America	2021-01-19
MW701119	14	6	4	USA	Northern America	2020-12-29
MW701149	14	6	4	USA	Northern America	2020-12-26
MW701902	14	6	4	USA	Northern America	2020-12-02
MW702902	14	6	4	USA	Northern America	2020-12-26
MW728419	14	6	4	USA	Northern America	2021-02-15
MW731051	14	6	4	USA	Northern America	2021-01-02
MW731288	14	6	4	USA	Northern America	2021-02-01
MW738286	14	6	4	USA	Northern America	2020-12-21
MW738474	14	6	4	USA	Northern America	2021-01-13
MW749382	14	6	4	USA	Northern America	2021-02-24
MW749432	14	6	4	USA	Northern America	2021-02-24
MW749617	14	6	4	USA	Northern America	2021-02-26
MW749976	14	6	4	USA	Northern America	2021-01-04
MW771996	14	6	4	USA	Northern America	2021-02-27
MW772057	14	6	4	USA	Northern America	2021-02-28
MW772158	14	6	4	USA	Northern America	2021-02-26
MW777211	14	6	4	USA	Northern America	2021-02-11
MW778286	14	6	4	USA	Northern America	2021-02-18
MW779110	14	6	4	USA	Northern America	2021-02-22
MW781216	14	6	4	USA	Northern America	2021-03-04
MW781843	14	6	4	USA	Northern America	2021-03-01
MT873475	14	6	3	USA	Northern America	2020-04-29
MW153777	14	6	3	Australia	Australia and New Zealand	2020-08-02
MW155961	14	6	3	Australia	Australia and New Zealand	2020-08-15
MW277445	14	6	3	Australia	Australia and New Zealand	2020-08-16
MW420661	14	6	3	USA	Northern America	2020-10-07
MW462674	14	6	3	USA	Northern America	2020-12-27
MW485264	14	6	3	USA	Northern America	2020-12-28
MW493951	14	6	3	USA	Northern America	2020-12-07
MW513631	14	6	3	USA	Northern America	2021-01-03
MW555927	14	6	3	USA	Northern America	2021-01-11
MW560919	14	6	3	USA	Northern America	2021-01-18
MW564790	14	6	3	USA	Northern America	2020-12-03
MW564889	14	6	3	USA	Northern America	2020-11-22
MW586127	14	6	3	USA	Northern America	2021-01-29
MW586260	14	6	3	USA	Northern America	2021-01-27
MW586439	14	6	3	USA	Northern America	2021-01-22
MW586707	14	6	3	USA	Northern America	2021-01-15
MW586775	14	6	3	USA	Northern America	2021-01-16
MW617613	14	6	3	USA	Northern America	2021-01-30
MW631906	14	6	3	USA	Northern America	2021-02-08
MW635141	14	6	3	USA	Northern America	2020-12-31
MW635159	14	6	3	USA	Northern America	2021-01-04
MW636338	14	6	3	USA	Northern America	2021-01-16
MW636339	14	6	3	USA	Northern America	2021-01-15
MW638260	14	6	3	USA	Northern America	2021-01-11
MW640034	14	6	3	USA	Northern America	2021-01-20
MW644114	14	6	3	USA	Northern America	2021-01-28
MW646737	14	6	3	USA	Northern America	2021-01-27
MW671638	14	6	3	USA	Northern America	2021-02-01
MW671663	14	6	3	USA	Northern America	2021-01-31
MW672758	14	6	3	USA	Northern America	2021-02-04
MW673235	14	6	3	USA	Northern America	2021-01-29
MW674249	14	6	3	USA	Northern America	2021-02-11
MW696722	14	6	3	USA	Northern America	2021-02-11
MW700488	14	6	3	USA	Northern America	2020-12-10
MW701150	14	6	3	USA	Northern America	2021-01-03
MW702071	14	6	3	USA	Northern America	2020-12-28
MW702073	14	6	3	USA	Northern America	2020-12-28
MW702089	14	6	3	USA	Northern America	2020-12-23
MW702186	14	6	3	USA	Northern America	2020-12-27
MW702374	14	6	3	USA	Northern America	2021-01-05
MW702401	14	6	3	USA	Northern America	2021-01-04
MW702410	14	6	3	USA	Northern America	2021-01-04
MW702785	14	6	3	USA	Northern America	2021-01-13
MW702840	14	6	3	USA	Northern America	2020-12-21
MW702841	14	6	3	USA	Northern America	2020-12-21
MW702991	14	6	3	USA	Northern America	2021-01-21
MW705443	14	6	3	USA	Northern America	2021-02-10
MW705778	14	6	3	USA	Northern America	2021-02-09
MW707911	14	6	3	USA	Northern America	2021-02-15
MW708141	14	6	3	USA	Northern America	2021-01-20
MW728578	14	6	3	USA	Northern America	2021-02-22
MW731784	14	6	3	USA	Northern America	2021-02-09
MW733210	14	6	3	USA	Northern America	2021-02-24
MW734273	14	6	3	USA	Northern America	2021-02-23
MW734831	14	6	3	USA	Northern America	2021-02-19
MW735218	14	6	3	USA	Northern America	2021-02-25
MW736689	14	6	3	USA	Northern America	2021-01-11
MW737984	14	6	3	USA	Northern America	2021-01-20
MW738159	14	6	3	USA	Northern America	2020-12-11
MW738223	14	6	3	USA	Northern America	2020-12-15
MW738224	14	6	3	USA	Northern America	2020-12-15
MW738735	14	6	3	USA	Northern America	2020-12-10
MW739424	14	6	3	USA	Northern America	2021-02-02
MW739542	14	6	3	USA	Northern America	2021-01-16
MW739548	14	6	3	USA	Northern America	2021-01-16
MW758837	14	6	3	USA	Northern America	2021-02-22
MW763798	14	6	3	USA	Northern America	2021-02-28
MW766460	14	6	3	USA	Northern America	2021-02-02
MW766620	14	6	3	USA	Northern America	2021-02-19
MW767571	14	6	3	USA	Northern America	2021-02-26
MW771977	14	6	3	USA	Northern America	2021-03-04
MW777353	14	6	3	USA	Northern America	2021-02-19
MW777387	14	6	3	USA	Northern America	2021-02-17
MW777558	14	6	3	USA	Northern America	2021-02-14
MW777714	14	6	3	USA	Northern America	2021-02-17
MW777856	14	6	3	USA	Northern America	2021-02-15
MW778130	14	6	3	USA	Northern America	2021-02-19
MW778186	14	6	3	USA	Northern America	2021-02-21
MW778297	14	6	3	USA	Northern America	2021-02-18
MW778358	14	6	3	USA	Northern America	2021-02-18
MW778567	14	6	3	USA	Northern America	2021-02-21
MW778861	14	6	3	USA	Northern America	2021-02-21
MW778866	14	6	3	USA	Northern America	2021-02-21
MW779254	14	6	3	USA	Northern America	2021-02-24
MW779400	14	6	3	USA	Northern America	2021-02-24
MW779714	14	6	3	USA	Northern America	2021-03-03
MW781047	14	6	3	USA	Northern America	2021-02-24
MW783127	14	6	3	USA	Northern America	2021-03-02
MW586740	14	6	2	USA	Northern America	2021-01-10
MW596048	14	6	2	USA	Northern America	2021-01-30
MW596172	14	6	2	USA	Northern America	2021-01-08
MW617807	14	6	2	USA	Northern America	2021-01-19
MW631924	14	6	2	USA	Northern America	2021-02-07
MW638942	14	6	2	USA	Northern America	2021-01-08
MW643756	14	6	2	USA	Northern America	2021-01-31
MW643757	14	6	2	USA	Northern America	2021-01-31
MW644022	14	6	2	USA	Northern America	2021-02-02
MW669539	14	6	2	USA	Northern America	2021-02-07
MW672720	14	6	2	USA	Northern America	2021-02-02
MW693861	14	6	2	USA	Northern America	2021-02-12
MW700532	14	6	2	USA	Northern America	2020-11-29
MW715158	14	6	2	USA	Northern America	2021-02-16
MW720286	14	6	2	USA	Northern America	2021-02-19
MW734357	14	6	2	USA	Northern America	2021-02-17
MW758596	14	6	2	USA	Northern America	2021-02-24
MW772123	14	6	2	USA	Northern America	2021-02-28
MW776913	14	6	2	USA	Northern America	2021-03-01
MW776998	14	6	2	USA	Northern America	2021-02-16
MW777042	14	6	2	USA	Northern America	2021-02-15
MW777095	14	6	2	USA	Northern America	2021-02-15
MW777331	14	6	2	USA	Northern America	2021-02-19
MW777386	14	6	2	USA	Northern America	2021-02-17
MW778031	14	6	2	USA	Northern America	2021-02-20
MW778468	14	6	2	USA	Northern America	2021-02-23
MW778734	14	6	2	USA	Northern America	2021-02-21
MW779177	14	6	2	USA	Northern America	2021-02-23
MW779293	14	6	2	USA	Northern America	2021-02-22
MW702784	14	6	1	USA	Northern America	2021-01-19
MW596029	15	6	7	USA	Northern America	2021-01-29
MW638990	15	6	6	USA	Northern America	2021-01-08
MW638991	15	6	6	USA	Northern America	2021-01-08
MW642818	15	6	5	USA	Northern America	2021-01-29
MW674823	15	6	5	Israel	Western Asia	2020-04-09
MW687582	15	6	5	USA	Northern America	2021-02-10
MW704343	15	6	5	Bahrain	Western Asia	2021-02-08
MW768026	15	6	5	USA	Northern America	2021-02-25
LC606017	15	6	4	Japan	Eastern Asia	2020-08
MW241380	15	6	4	USA	Northern America	2020-09-28
MW406694	15	6	4	USA	Northern America	2020-06-24
MW549810	15	6	4	USA	Northern America	2020-12-25
MW560752	15	6	4	USA	Northern America	2021-01-14
MW560774	15	6	4	USA	Northern America	2021-01-14
MW562709	15	6	4	USA	Northern America	2020-12-28
MW661016	15	6	4	USA	Northern America	2020-11-17
MW694010	15	6	4	USA	Northern America	2021-02-11
MW700656	15	6	4	USA	Northern America	2021-01-10
MW700661	15	6	4	USA	Northern America	2021-01-12
MW701147	15	6	4	USA	Northern America	2020-12-28
MW702132	15	6	4	USA	Northern America	2020-12-21
MW702133	15	6	4	USA	Northern America	2020-12-21
MW702139	15	6	4	USA	Northern America	2020-12-21
MW702187	15	6	4	USA	Northern America	2020-12-24
MW702521	15	6	4	USA	Northern America	2020-12-09
MW703071	15	6	4	USA	Northern America	2021-01-03
MW707799	15	6	4	USA	Northern America	2021-02-12
MW719831	15	6	4	USA	Northern America	2021-02-15
MW720216	15	6	4	USA	Northern America	2021-02-19
MW731295	15	6	4	USA	Northern America	2021-02-09
MW734390	15	6	4	USA	Northern America	2021-02-19
MW738462	15	6	4	USA	Northern America	2021-01-11
MW738472	15	6	4	USA	Northern America	2021-01-13
MW750116	15	6	4	USA	Northern America	2021-02-22
MW763471	15	6	4	USA	Northern America	2021-02-27
MW763751	15	6	4	USA	Northern America	2021-02-27
MW777619	15	6	4	USA	Northern America	2021-02-15
MW781562	15	6	4	USA	Northern America	2021-03-01
MW783336	15	6	4	USA	Northern America	2021-03-03
MW035440	15	6	3	USA	Northern America	2020-08-24
MW424867	15	6	3	USA	Northern America	2020-12-20
MW453114	15	6	3	USA	Northern America	2020-12-22
MW495069	15	6	3	USA	Northern America	2021-01-08
MW545329	15	6	3	USA	Northern America	2021-01-09
MW545433	15	6	3	USA	Northern America	2021-01-12
MW548320	15	6	3	USA	Northern America	2021-01-11
MW579045	15	6	3	USA	Northern America	2021-01-15
MW586503	15	6	3	USA	Northern America	2021-01-21
MW591576	15	6	3	USA	Northern America	2021-01-08
MW596152	15	6	3	USA	Northern America	2021-01-08
MW634688	15	6	3	USA	Northern America	2020-12-28
MW638774	15	6	3	USA	Northern America	2021-01-05
MW640073	15	6	3	USA	Northern America	2021-01-20
MW640093	15	6	3	USA	Northern America	2021-01-21
MW643026	15	6	3	USA	Northern America	2021-02-01
MW644196	15	6	3	USA	Northern America	2021-02-01
MW648746	15	6	3	USA	Northern America	2021-02-02
MW648755	15	6	3	USA	Northern America	2021-02-02
MW669214	15	6	3	USA	Northern America	2021-02-08
MW671602	15	6	3	USA	Northern America	2021-02-01
MW671605	15	6	3	USA	Northern America	2021-02-01
MW671670	15	6	3	USA	Northern America	2021-02-01
MW671674	15	6	3	USA	Northern America	2021-02-01
MW671729	15	6	3	USA	Northern America	2021-01-31
MW671734	15	6	3	USA	Northern America	2021-02-01
MW672736	15	6	3	USA	Northern America	2021-02-03
MW672804	15	6	3	USA	Northern America	2021-02-03
MW674253	15	6	3	USA	Northern America	2021-02-12
MW693511	15	6	3	USA	Northern America	2021-02-11
MW693562	15	6	3	USA	Northern America	2021-02-09
MW693708	15	6	3	USA	Northern America	2021-02-11
MW693906	15	6	3	USA	Northern America	2021-02-10
MW694465	15	6	3	USA	Northern America	2021-01-27
MW696814	15	6	3	USA	Northern America	2021-02-09
MW700686	15	6	3	USA	Northern America	2021-01-14
MW701197	15	6	3	USA	Northern America	2020-12-28
MW702070	15	6	3	USA	Northern America	2020-12-28
MW702395	15	6	3	USA	Northern America	2021-01-05
MW702405	15	6	3	USA	Northern America	2021-01-04
MW702425	15	6	3	USA	Northern America	2021-01-04
MW702434	15	6	3	USA	Northern America	2021-01-03
MW702751	15	6	3	USA	Northern America	2021-01-15
MW702790	15	6	3	USA	Northern America	2021-01-13
MW702942	15	6	3	USA	Northern America	2020-12-24
MW702943	15	6	3	USA	Northern America	2020-12-24
MW705005	15	6	3	USA	Northern America	2021-02-11
MW705573	15	6	3	USA	Northern America	2021-02-10
MW705711	15	6	3	USA	Northern America	2021-02-09
MW707153	15	6	3	USA	Northern America	2021-02-17
MW707594	15	6	3	USA	Northern America	2021-02-14
MW707782	15	6	3	USA	Northern America	2021-02-13
MW707783	15	6	3	USA	Northern America	2021-02-13
MW707807	15	6	3	USA	Northern America	2021-02-14
MW708761	15	6	3	USA	Northern America	2021-01-19
MW715482	15	6	3	USA	Northern America	2021-02-08
MW719810	15	6	3	USA	Northern America	2021-02-20
MW720849	15	6	3	USA	Northern America	2021-02-10
MW720850	15	6	3	USA	Northern America	2021-02-10
MW731210	15	6	3	USA	Northern America	2021-02-10
MW733908	15	6	3	USA	Northern America	2021-02-16
MW734308	15	6	3	USA	Northern America	2021-02-17
MW734556	15	6	3	USA	Northern America	2021-02-21
MW736693	15	6	3	USA	Northern America	2021-01-11
MW736701	15	6	3	USA	Northern America	2021-01-11
MW738370	15	6	3	USA	Northern America	2021-01-05
MW738738	15	6	3	USA	Northern America	2020-12-10
MW739516	15	6	3	USA	Northern America	2021-01-21
MW739659	15	6	3	USA	Northern America	2021-02-03
MW763186	15	6	3	USA	Northern America	2021-02-12
MW766556	15	6	3	USA	Northern America	2021-02-24
MW766557	15	6	3	USA	Northern America	2021-02-22
MW767211	15	6	3	USA	Northern America	2021-02-13
MW771805	15	6	3	USA	Northern America	2021-02-27
MW772081	15	6	3	USA	Northern America	2021-02-27
MW776949	15	6	3	USA	Northern America	2021-02-14
MW776979	15	6	3	USA	Northern America	2021-02-15
MW777683	15	6	3	USA	Northern America	2021-02-17
MW777975	15	6	3	USA	Northern America	2021-02-19
MW778037	15	6	3	USA	Northern America	2021-02-21
MW778255	15	6	3	USA	Northern America	2021-02-20
MW778402	15	6	3	USA	Northern America	2021-02-17
MW778448	15	6	3	USA	Northern America	2021-02-22
MW778484	15	6	3	USA	Northern America	2021-02-22
MW778802	15	6	3	USA	Northern America	2021-02-19
MW778895	15	6	3	USA	Northern America	2021-02-22
MW779047	15	6	3	USA	Northern America	2021-02-22
MW780388	15	6	3	USA	Northern America	2021-02-22
MW780390	15	6	3	USA	Northern America	2021-02-22
MW781331	15	6	3	USA	Northern America	2021-02-19
MW781336	15	6	3	USA	Northern America	2021-02-20
MW781572	15	6	3	USA	Northern America	2021-03-03
MW783382	15	6	3	USA	Northern America	2021-03-01
MW513626	15	6	2	USA	Northern America	2021-01-04
MW545254	15	6	2	USA	Northern America	2021-01-08
MW545425	15	6	2	USA	Northern America	2021-01-12
MW560917	15	6	2	USA	Northern America	2021-01-18
MW566195	15	6	2	USA	Northern America	2020-12-29
MW583211	15	6	2	USA	Northern America	2021-01-16
MW586725	15	6	2	USA	Northern America	2021-01-15
MW586739	15	6	2	USA	Northern America	2021-01-10
MW653659	15	6	2	USA	Northern America	2020-12-06
MW673114	15	6	2	USA	Northern America	2021-02-08
MW674265	15	6	2	USA	Northern America	2021-02-07
MW679503	15	6	2	USA	Northern America	2021-01-21
MW689755	15	6	2	USA	Northern America	2021-02-03
MW689765	15	6	2	USA	Northern America	2021-02-03
MW702750	15	6	2	USA	Northern America	2021-01-16
MW702800	15	6	2	USA	Northern America	2021-01-13
MW702810	15	6	2	USA	Northern America	2021-01-12
MW703409	15	6	2	USA	Northern America	2021-02
MW703410	15	6	2	USA	Northern America	2021-02
MW703411	15	6	2	USA	Northern America	2021-02
MW706526	15	6	2	USA	Northern America	2021-02-10
MW709033	15	6	2	USA	Northern America	2021-01-04
MW719638	15	6	2	USA	Northern America	2021-02-15
MW720259	15	6	2	USA	Northern America	2021-02-20
MW725734	15	6	2	USA	Northern America	2021-02-16
MW725773	15	6	2	USA	Northern America	2021-02-15
MW730993	15	6	2	USA	Northern America	2021-01-08
MW731224	15	6	2	USA	Northern America	2021-01-30
MW731273	15	6	2	USA	Northern America	2021-02-04
MW735464	15	6	2	USA	Northern America	2021-01-29
MW738005	15	6	2	USA	Northern America	2021-01-19
MW749585	15	6	2	USA	Northern America	2021-02-23
MW750913	15	6	2	USA	Northern America	2021-01-12
MW758634	15	6	2	USA	Northern America	2021-02-26
MW766423	15	6	2	USA	Northern America	2021-02-16
MW766770	15	6	2	USA	Northern America	2021-02-18
MW766773	15	6	2	USA	Northern America	2021-02-12
MW766774	15	6	2	USA	Northern America	2021-02-26
MW766775	15	6	2	USA	Northern America	2021-02-12
MW766780	15	6	2	USA	Northern America	2021-02-25
MW771973	15	6	2	USA	Northern America	2021-03-03
MW772065	15	6	2	USA	Northern America	2021-02-27
MW772201	15	6	2	USA	Northern America	2021-02-26
MW773315	15	6	2	USA	Northern America	2021-03-02
MW777094	15	6	2	USA	Northern America	2021-02-16
MW777741	15	6	2	USA	Northern America	2021-02-17
MW778292	15	6	2	USA	Northern America	2021-02-17
MW778699	15	6	2	USA	Northern America	2021-02-24
MW778781	15	6	2	USA	Northern America	2021-02-20
MW782796	15	6	2	USA	Northern America	2021-03-04
MW783095	15	6	2	USA	Northern America	2021-03-01
MW778603	16	6	7	USA	Northern America	2021-02-14
MW706573	16	6	6	USA	Northern America	2021-02-07
MW184129	16	6	5	Australia	Australia and New Zealand	2020-08-18
MW424945	16	6	5	USA	Northern America	2020-06-18
MW616857	16	6	5	USA	Northern America	2021-01-05
MW644517	16	6	5	USA	Northern America	2021-02-04
MW689792	16	6	5	USA	Northern America	2021-02-03
MW424897	16	6	4	USA	Northern America	2020-06-18
MW495233	16	6	4	USA	Northern America	2021-01-06
MW559157	16	6	4	USA	Northern America	2020-12-28
MW562742	16	6	4	USA	Northern America	2020-12-28
MW642685	16	6	4	USA	Northern America	2021-01-28
MW667543	16	6	4	USA	Northern America	2021-01-26
MW669159	16	6	4	USA	Northern America	2021-02-08
MW669387	16	6	4	USA	Northern America	2021-02-08
MW669537	16	6	4	USA	Northern America	2021-02-08
MW672801	16	6	4	USA	Northern America	2021-02-05
MW693984	16	6	4	USA	Northern America	2021-02-11
MW700605	16	6	4	USA	Northern America	2021-01-06
MW700627	16	6	4	USA	Northern America	2021-01-14
MW700649	16	6	4	USA	Northern America	2021-01-10
MW700664	16	6	4	USA	Northern America	2021-01-12
MW701172	16	6	4	USA	Northern America	2020-12-29
MW701920	16	6	4	USA	Northern America	2020-12-02
MW702131	16	6	4	USA	Northern America	2020-12-21
MW702134	16	6	4	USA	Northern America	2020-12-21
MW702135	16	6	4	USA	Northern America	2020-12-21
MW702136	16	6	4	USA	Northern America	2020-12-21
MW702651	16	6	4	USA	Northern America	2020-12-28
MW703038	16	6	4	USA	Northern America	2021-01-06
MW703039	16	6	4	USA	Northern America	2021-01-06
MW731387	16	6	4	USA	Northern America	2021-02-09
MW731388	16	6	4	USA	Northern America	2021-02-09
MW731744	16	6	4	USA	Northern America	2021-02-20
MW734625	16	6	4	USA	Northern America	2021-02-23
MW737880	16	6	4	USA	Northern America	2021-02-05
MW738596	16	6	4	USA	Northern America	2020-12-06
MW739563	16	6	4	USA	Northern America	2021-01-16
MW741648	16	6	4	USA	Northern America	2020-11-07
MW749447	16	6	4	USA	Northern America	2021-02-25
MW750085	16	6	4	USA	Northern America	2021-02-06
MW752019	16	6	4	USA	Northern America	2021-02-16
MW758671	16	6	4	USA	Northern America	2021-02-24
MW763111	16	6	4	USA	Northern America	2021-01-29
MW766434	16	6	4	USA	Northern America	2021-02-22
MW776952	16	6	4	USA	Northern America	2021-02-14
MW777189	16	6	4	USA	Northern America	2021-02-13
MW778968	16	6	4	USA	Northern America	2021-02-22
MW778970	16	6	4	USA	Northern America	2021-02-22
MW184503	16	6	3	Australia	Australia and New Zealand	2020-07-29
MW349067	16	6	3	USA	Northern America	2020-10-29
MW349068	16	6	3	USA	Northern America	2020-10-29
MW411927	16	6	3	USA	Northern America	2020-12-16
MW453123	16	6	3	USA	Northern America	2020-12-28
MW485889	16	6	3	USA	Northern America	2021-01-07
MW495961	16	6	3	USA	Northern America	2020-12-02
MW519825	16	6	3	USA	Northern America	2021-01-03
MW545191	16	6	3	USA	Northern America	2021-01-09
MW545436	16	6	3	USA	Northern America	2021-01-12
MW545466	16	6	3	USA	Northern America	2021-01-11
MW550698	16	6	3	USA	Northern America	2020-12-31
MW550730	16	6	3	USA	Northern America	2021-01-02
MW560909	16	6	3	USA	Northern America	2021-01-18
MW585846	16	6	3	USA	Northern America	2021-01-19
MW586015	16	6	3	USA	Northern America	2021-01-14
MW586328	16	6	3	USA	Northern America	2021-01-24
MW586733	16	6	3	USA	Northern America	2021-01-15
MW617495	16	6	3	USA	Northern America	2021-02-01
MW634173	16	6	3	USA	Northern America	2020-12-27
MW636355	16	6	3	USA	Northern America	2021-01-16
MW639982	16	6	3	USA	Northern America	2021-01-20
MW640127	16	6	3	USA	Northern America	2021-01-21
MW643767	16	6	3	USA	Northern America	2021-01-31
[truncated: 5,349 more rows]
